# Supplementary material for: Lobosteroids A–F, six new highly oxidized steroids from the Chinese Soft Coral Lobophytum sp.
Source: Preprints.org preprint supplement (doi:10.20944/preprints202307.1996.v1), 2023-07-28
Supplement: Supplementary file 1 [file supplementary]

## Supplementary Materials

- Figure S1.**  $^1\text{H}$  NMR spectrum (600 MHz) of compound **1** in  $\text{CDCl}_3$ .  
**Figure S2.**  $^{13}\text{C}$  NMR spectrum (125 MHz) of compound **1** in  $\text{CDCl}_3$ .  
**Figure S3.** HSQC spectrum (600 MHz) of compound **1** in  $\text{CDCl}_3$ .  
**Figure S4.** HMBC spectrum (600 MHz) of compound **1** in  $\text{CDCl}_3$ .  
**Figure S5.**  $^1\text{H}$ - $^1\text{H}$  COSY spectrum (600 MHz) of compound **1** in  $\text{CDCl}_3$ .  
**Figure S6.** NOESY spectrum (600 MHz) of compound **1** in  $\text{CDCl}_3$ .  
**Figure S7.** HR-ESIMS spectrum of compound **1**.  
**Figure S8.** IR spectrum of compound **1**.  
**Figure S9.**  $^1\text{H}$  NMR spectrum (800 MHz) of compound **2** in  $\text{CDCl}_3$ .  
**Figure S10.**  $^{13}\text{C}$  NMR spectrum (150 MHz) of compound **2** in  $\text{CDCl}_3$ .  
**Figure S11.** HSQC spectrum (800 MHz) of compound **2** in  $\text{CDCl}_3$ .  
**Figure S12.** HMBC spectrum (800 MHz) of compound **2** in  $\text{CDCl}_3$ .  
**Figure S13.**  $^1\text{H}$ - $^1\text{H}$  COSY spectrum (800 MHz) of compound **2** in  $\text{CDCl}_3$ .  
**Figure S14.** NOESY spectrum (800 MHz) of compound **2** in  $\text{CDCl}_3$ .  
**Figure S15.** HR-ESIMS spectrum of compound **2**.  
**Figure S16.** IR spectrum of compound **2**.  
**Figure S17.**  $^1\text{H}$  NMR spectrum (600 MHz) of compound **3** in  $\text{CDCl}_3$ .  
**Figure S18.**  $^{13}\text{C}$  NMR spectrum (200 MHz) of compound **3** in  $\text{CDCl}_3$ .  
**Figure S19.** HSQC spectrum (600 MHz) of compound **3** in  $\text{CDCl}_3$ .  
**Figure S20.** HMBC spectrum (600 MHz) of compound **3** in  $\text{CDCl}_3$ .  
**Figure S21.**  $^1\text{H}$ - $^1\text{H}$  COSY spectrum (600 MHz) of compound **3** in  $\text{CDCl}_3$ .  
**Figure S22.** ROESY spectrum (600 MHz) of compound **3** in  $\text{CDCl}_3$ .  
**Figure S23.** HR-ESIMS spectrum of compound **3**.  
**Figure S24.** IR spectrum of compound **3**.  
**Figure S25.**  $^1\text{H}$  NMR spectrum (600 MHz) of compound **4** in  $\text{CDCl}_3$ .  
**Figure S26.**  $^{13}\text{C}$  NMR spectrum (200 MHz) of compound **4** in  $\text{CDCl}_3$ .  
**Figure S27.** HSQC spectrum (600 MHz) of compound **4** in  $\text{CDCl}_3$ .  
**Figure S28.** HMBC spectrum (600 MHz) of compound **4** in  $\text{CDCl}_3$ .  
**Figure S29.**  $^1\text{H}$ - $^1\text{H}$  COSY spectrum (600 MHz) of compound **4** in  $\text{CDCl}_3$ .  
**Figure S30.** ROESY spectrum (600 MHz) of compound **4** in  $\text{CDCl}_3$ .  
**Figure S31.** HR-ESIMS spectrum of compound **4**.  
**Figure S32.** IR spectrum of compound **4**.  
**Figure S33.**  $^1\text{H}$  NMR spectrum (600 MHz) of compound **5** in  $\text{CDCl}_3$ .  
**Figure S34.**  $^{13}\text{C}$  NMR spectrum (150 MHz) of compound **5** in  $\text{CDCl}_3$ .  
**Figure S35.** HSQC spectrum (600 MHz) of compound **5** in  $\text{CDCl}_3$ .  
**Figure S36.** HMBC spectrum (600 MHz) of compound **5** in  $\text{CDCl}_3$ .  
**Figure S37.**  $^1\text{H}$ - $^1\text{H}$  COSY spectrum (600 MHz) of compound **5** in  $\text{CDCl}_3$ .  
**Figure S38.** NOESY spectrum (600 MHz) of compound **5** in  $\text{CDCl}_3$ .  
**Figure S39.** HR-ESIMS spectrum of compound **5**.  
**Figure S40.** IR spectrum of compound **5**.  
**Figure S41.**  $^1\text{H}$  NMR spectrum (400 MHz) of compound **6** in  $\text{CDCl}_3$ .

**Figure S42.**  $^{13}\text{C}$  NMR spectrum (150 MHz) of compound **6** in  $\text{CDCl}_3$ .

**Figure S43.** HSQC spectrum (600 MHz) of compound **6** in  $\text{CDCl}_3$ .

**Figure S44.** HMBC spectrum (600 MHz) of compound **6** in  $\text{CDCl}_3$ .

**Figure S45.**  $^1\text{H}$ - $^1\text{H}$  COSY spectrum (600 MHz) of compound **6** in  $\text{CDCl}_3$ .

**Figure S46.** NOESY spectrum (600 MHz) of compound **6** in  $\text{CDCl}_3$ .

**Figure S47.** HR-EIMS spectrum of compound **6**.

**Figure S48.** IR spectrum of compound **6**.

## 1. Spectra of compound 1

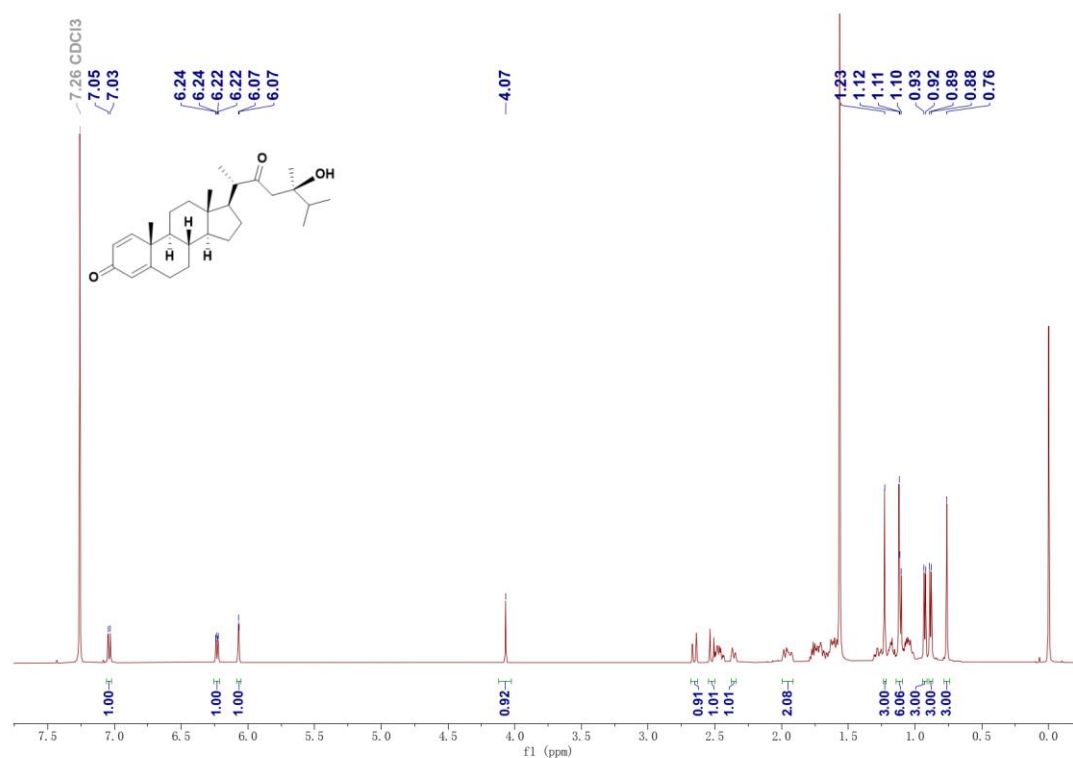

**Figure S1.** <sup>1</sup>H NMR spectrum (600 MHz) of compound **1** in CDCl<sub>3</sub>.

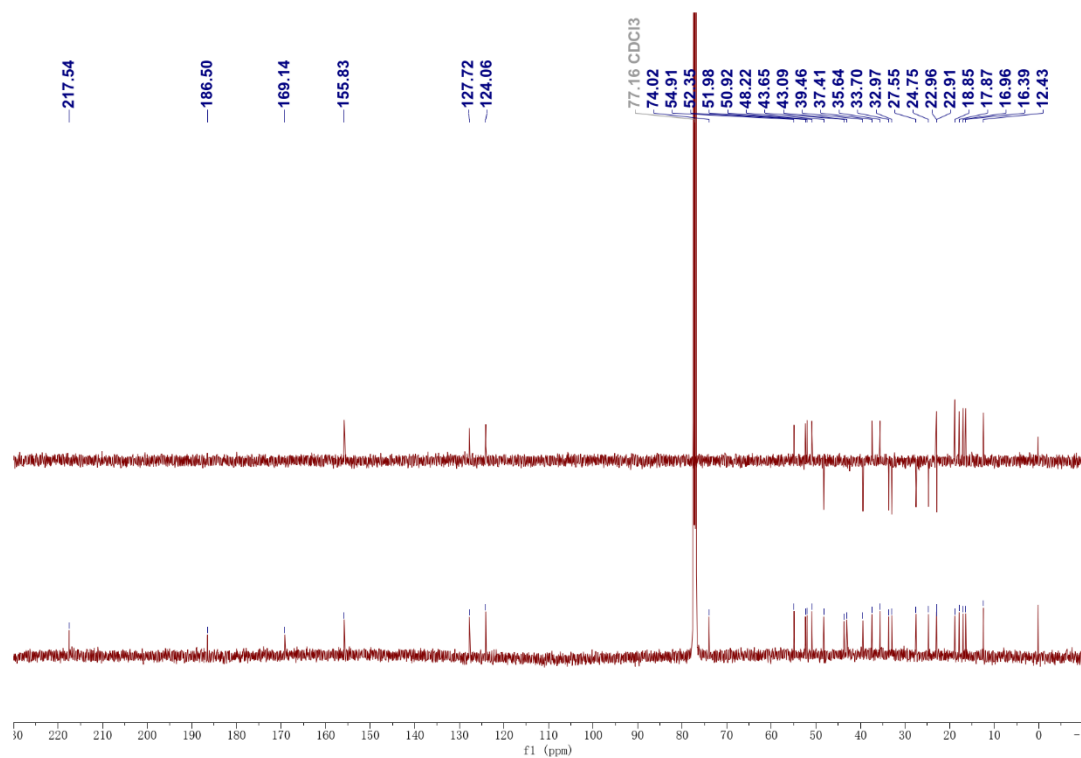

**Figure S2.** <sup>13</sup>C NMR spectrum (125 MHz) of compound **1** in CDCl<sub>3</sub>.

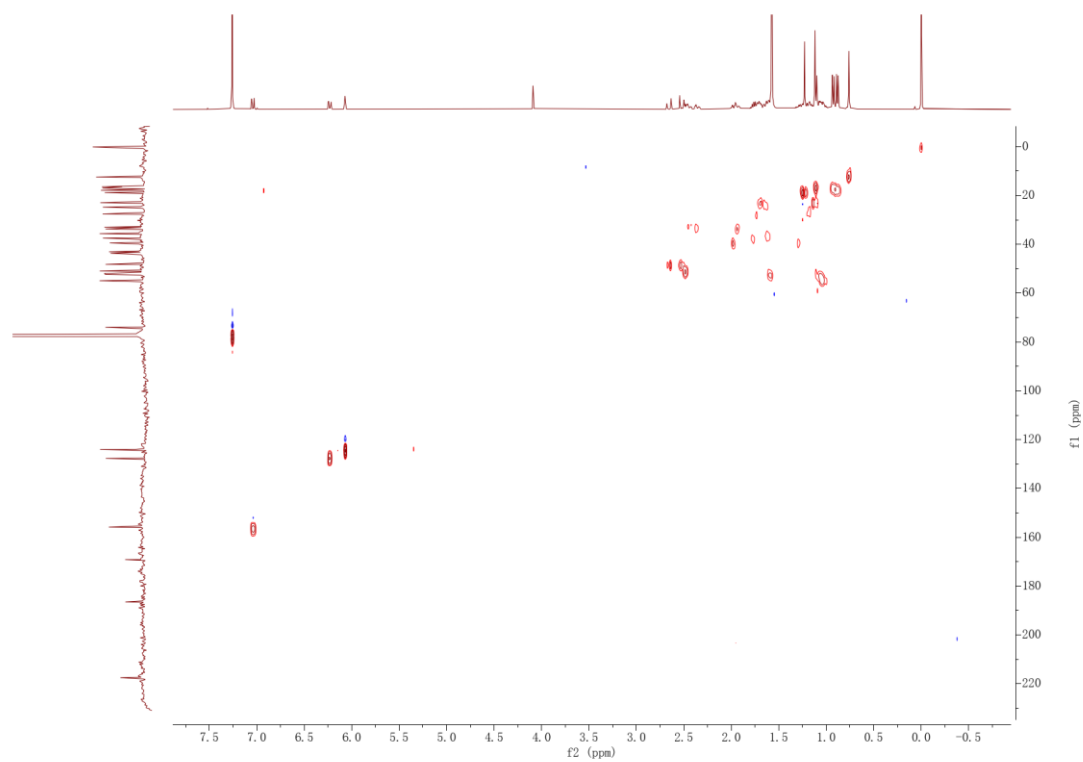

**Figure S3.** HSQC spectrum (600 MHz) of compound **1** in  $\text{CDCl}_3$ .

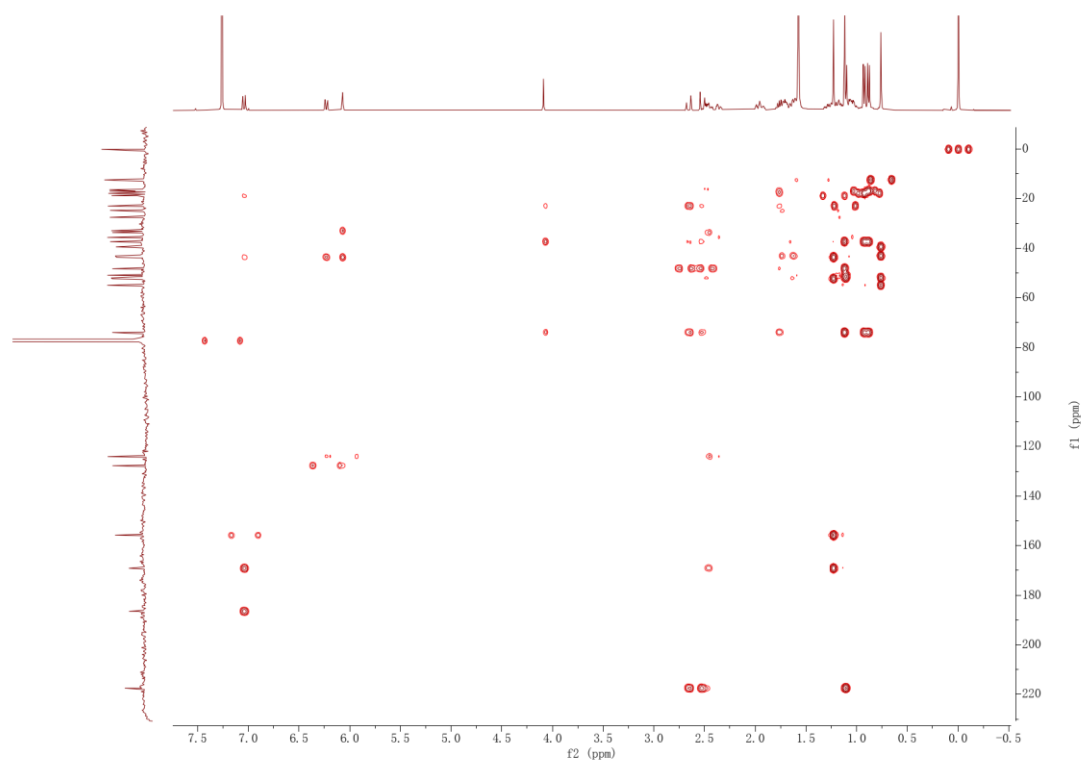

**Figure S4.** HMBC spectrum (600 MHz) of compound **1** in  $\text{CDCl}_3$ .

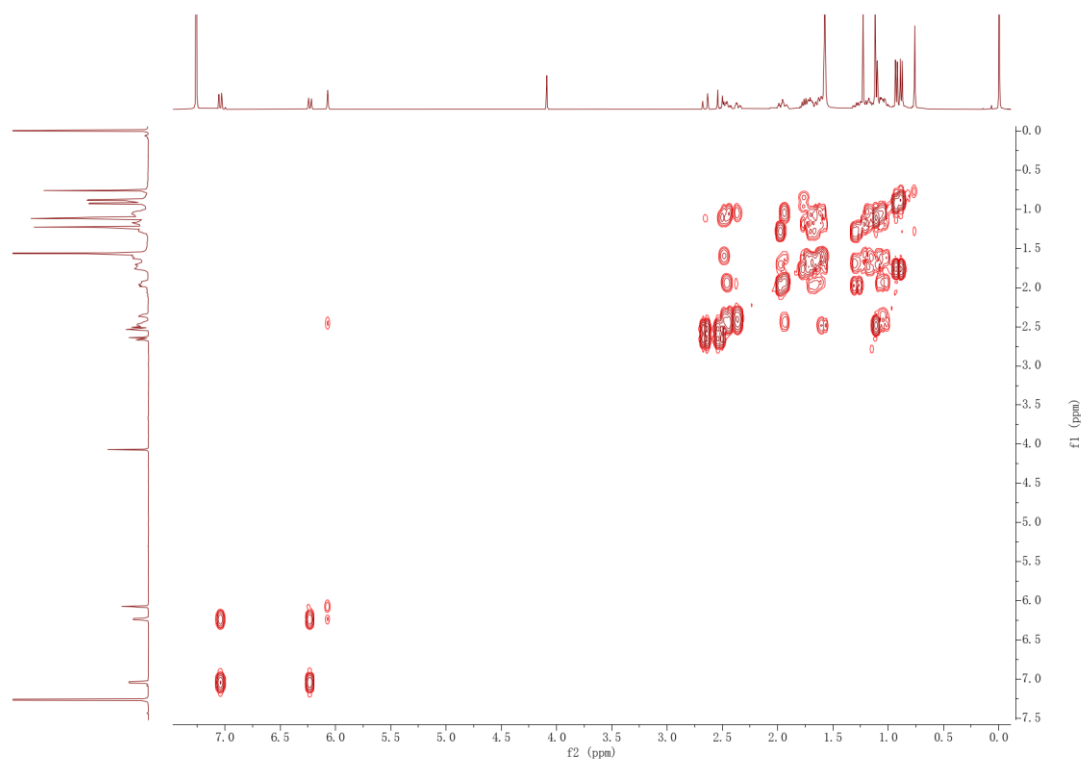

**Figure S5.**  $^1\text{H}$ - $^1\text{H}$  COSY spectrum (600 MHz) of compound **1** in  $\text{CDCl}_3$ .

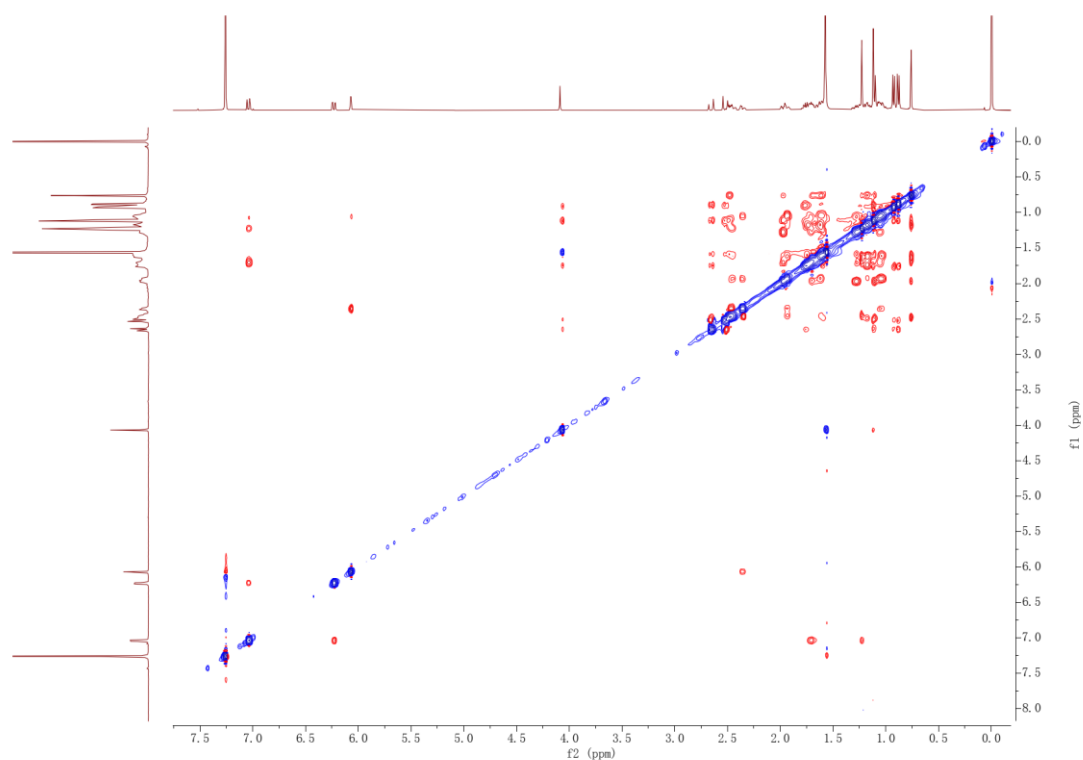

**Figure S6.** NOESY spectrum (600 MHz) of compound **1** in  $\text{CDCl}_3$ .

|                        |                                        |                               |                             |
|------------------------|----------------------------------------|-------------------------------|-----------------------------|
| <b>Data Filename</b>   | ESI202300411.d                         | <b>Sample Name</b>            | A8-A8-AFBBE-4               |
| <b>Sample ID</b>       |                                        | <b>Position</b>               | P1-D8                       |
| <b>Instrument Name</b> | Agilent G6520 Q-TOF                    | <b>Acq Method</b>             | 20160322_MS_ESIH_POS_1min.m |
| <b>Acquired Time</b>   | 1/11/2023 14:00:02                     | <b>IRM Calibration Status</b> | Success                     |
| <b>DA Method</b>       | small molecular data analysis method.m | <b>Comment</b>                | ESIH by fangsu              |

#### User Spectra

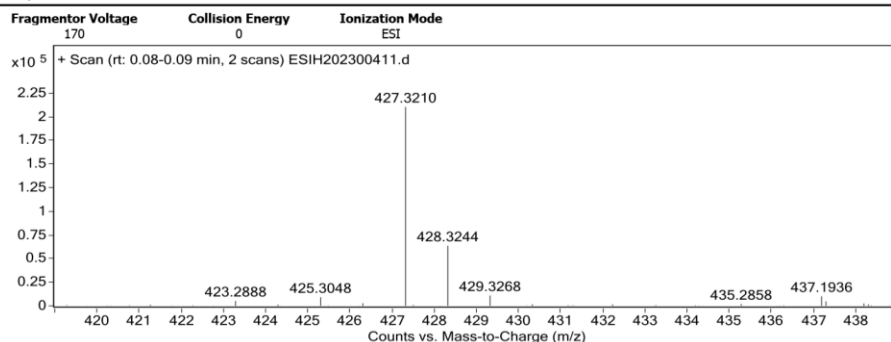

#### Formula Calculator Results

| m/z     | Calc m/z | Diff (mDa) | Diff (ppm) | Ion Formula                                    | Ion                |
|---------|----------|------------|------------|------------------------------------------------|--------------------|
| 427.321 | 427.3207 | -0.3       | -0.7       | C <sub>28</sub> H <sub>43</sub> O <sub>3</sub> | (M+H) <sup>+</sup> |

**Figure S7.** HR-ESIMS spectrum of compound **1**.

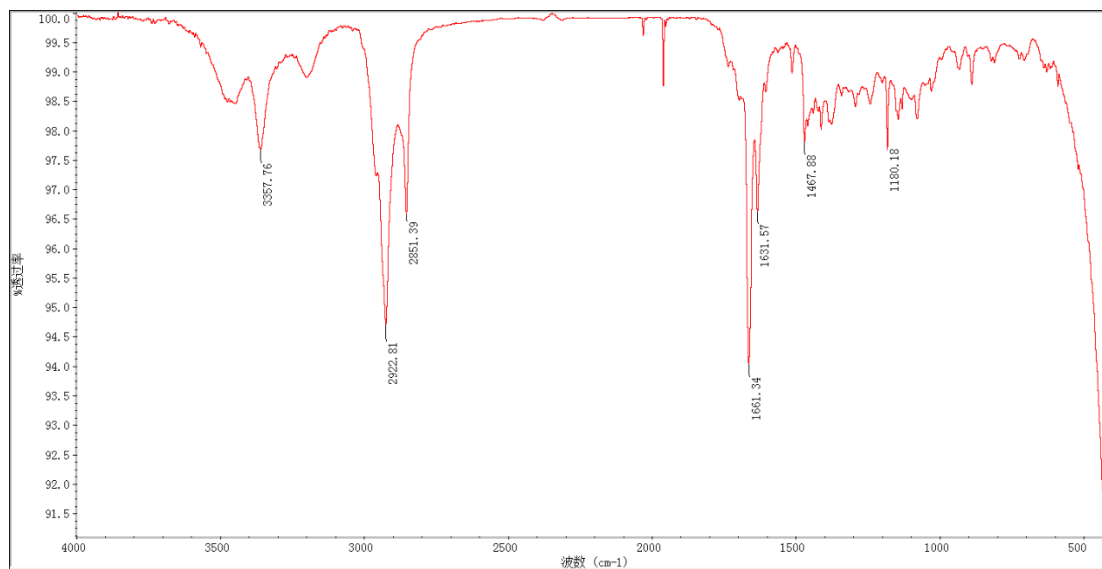

**Figure S8.** IR spectrum of compound **1**.

## 2. Spectra of compound 2

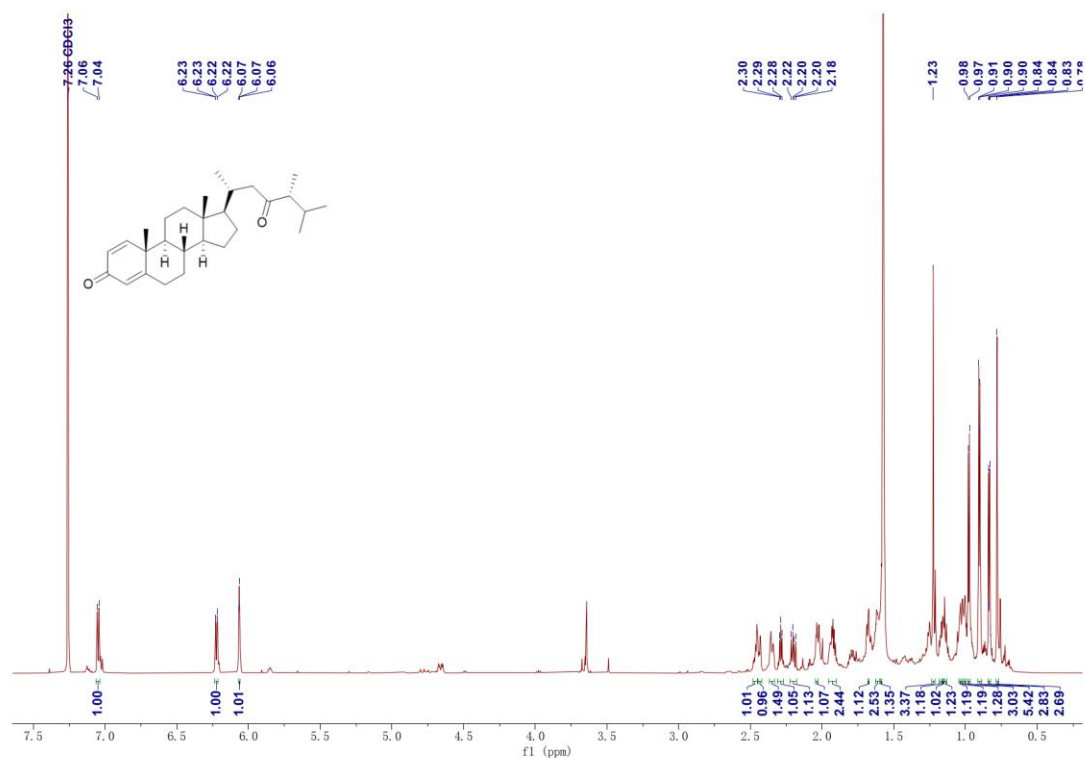

Figure S9. <sup>1</sup>H NMR spectrum (800 MHz) of compound 2 in CDCl<sub>3</sub>.

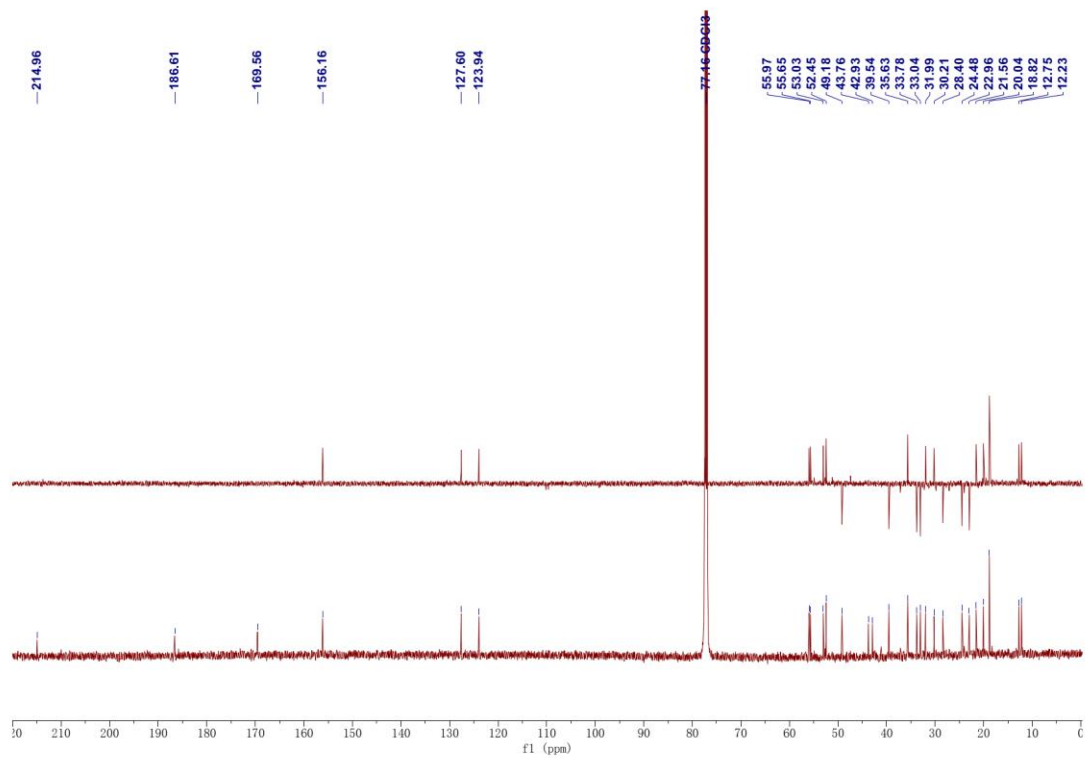

Figure S10. <sup>13</sup>C NMR spectrum (150 MHz) of compound 2 in CDCl<sub>3</sub>.

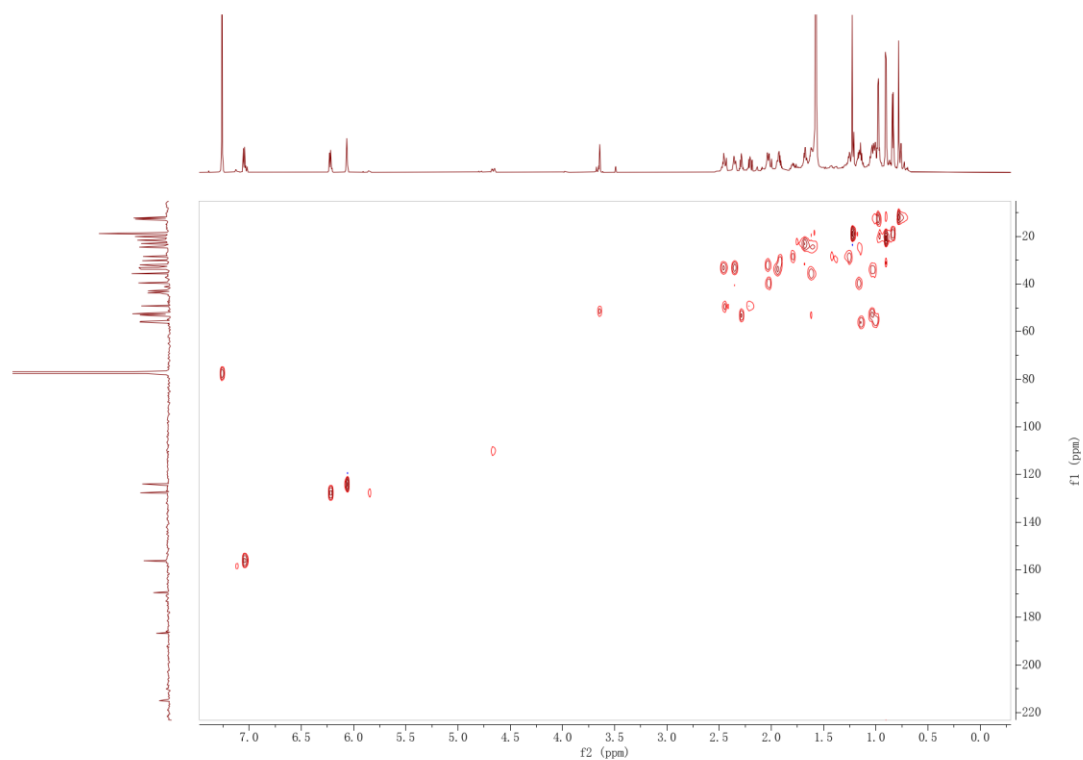

**Figure S11.** HSQC spectrum (800 MHz) of compound **2** in  $\text{CDCl}_3$ .

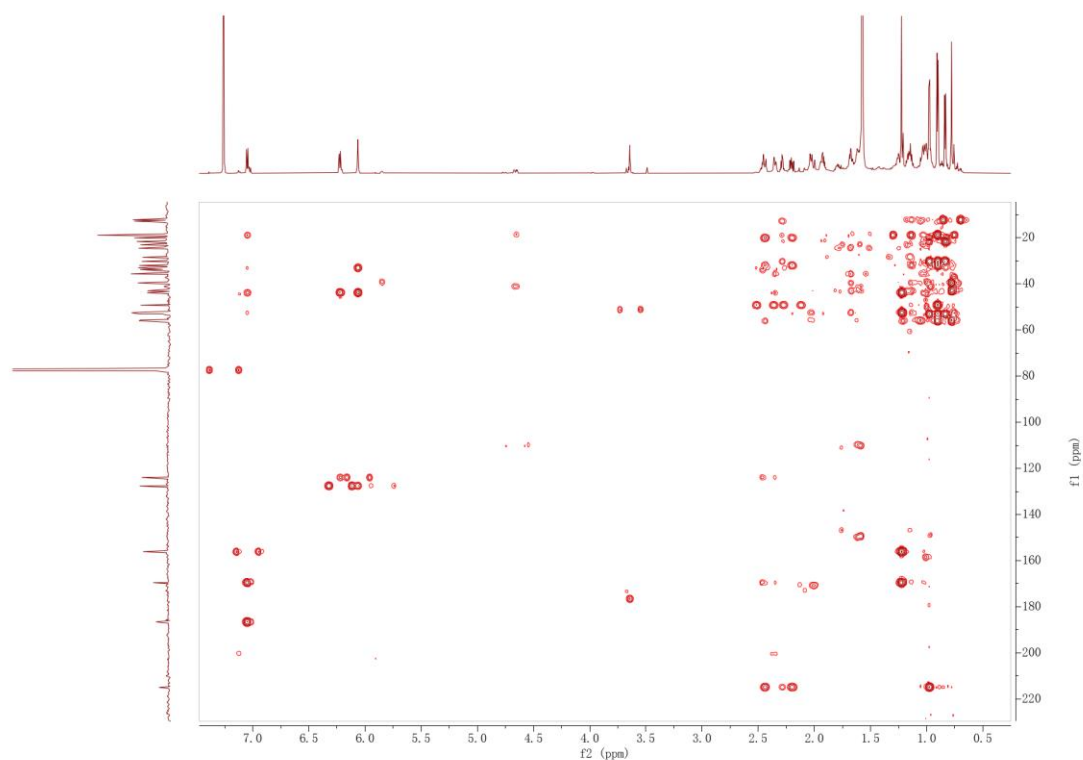

**Figure S12.** HMBC spectrum (800 MHz) of compound **2** in  $\text{CDCl}_3$ .



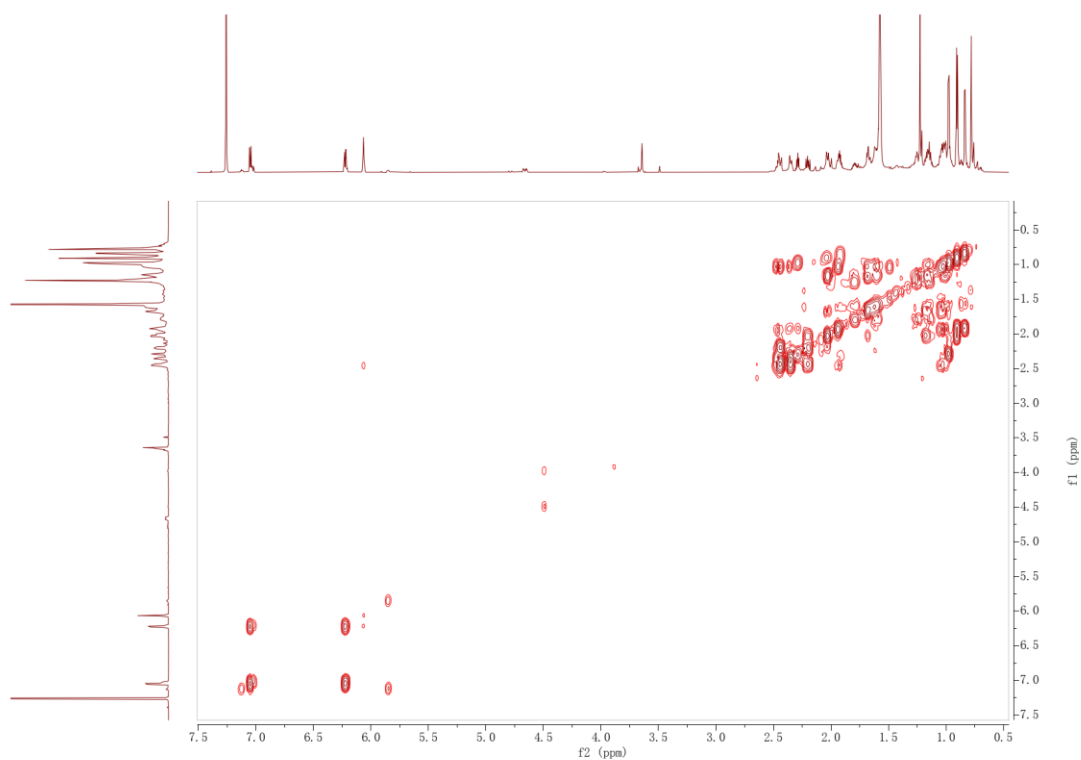

**Figure S13.**  $^1\text{H}$ - $^1\text{H}$  COSY spectrum (800 MHz) of compound **2** in  $\text{CDCl}_3$ .

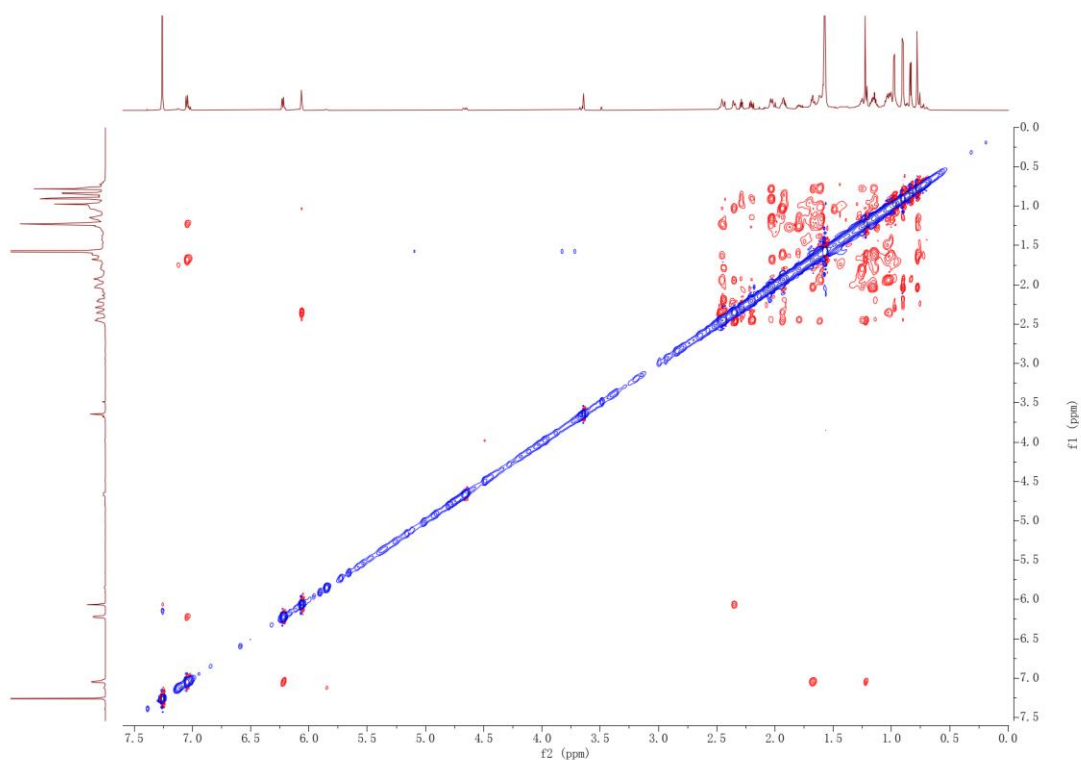

**Figure S14.** NOESY spectrum (800 MHz) of compound **2** in  $\text{CDCl}_3$ .

|                        |                                        |                               |                             |
|------------------------|----------------------------------------|-------------------------------|-----------------------------|
| <b>Data Filename</b>   | ESI202205966.d                         | <b>Sample Name</b>            | A8-2DCA-8                   |
| <b>Sample ID</b>       |                                        | <b>Position</b>               | P1-E7                       |
| <b>Instrument Name</b> | Agilent G6520 Q-TOF                    | <b>Acq Method</b>             | 20160322_MS_ESIH_POS_1min.m |
| <b>Acquired Time</b>   | 12/27/2022 10:35:10                    | <b>IRM Calibration Status</b> | Success                     |
| <b>DA Method</b>       | small molecular data analysis method.m | <b>Comment</b>                | ESIH by fangsu              |

#### User Spectra

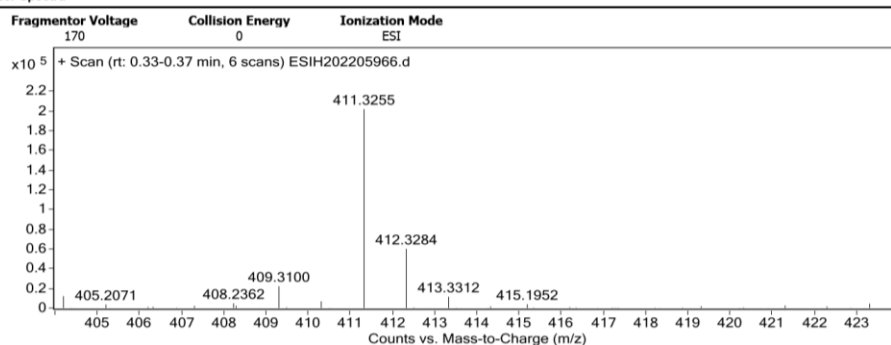

#### Formula Calculator Results

| m/z      | Calc m/z | Diff (mDa) | Diff (ppm) | Ion Formula                                    | Ion                |
|----------|----------|------------|------------|------------------------------------------------|--------------------|
| 411.3255 | 411.3258 | 0.24       | 0.57       | C <sub>28</sub> H <sub>43</sub> O <sub>2</sub> | (M+H) <sup>+</sup> |

**Figure S15.** HR-ESIMS spectrum of compound **2**.

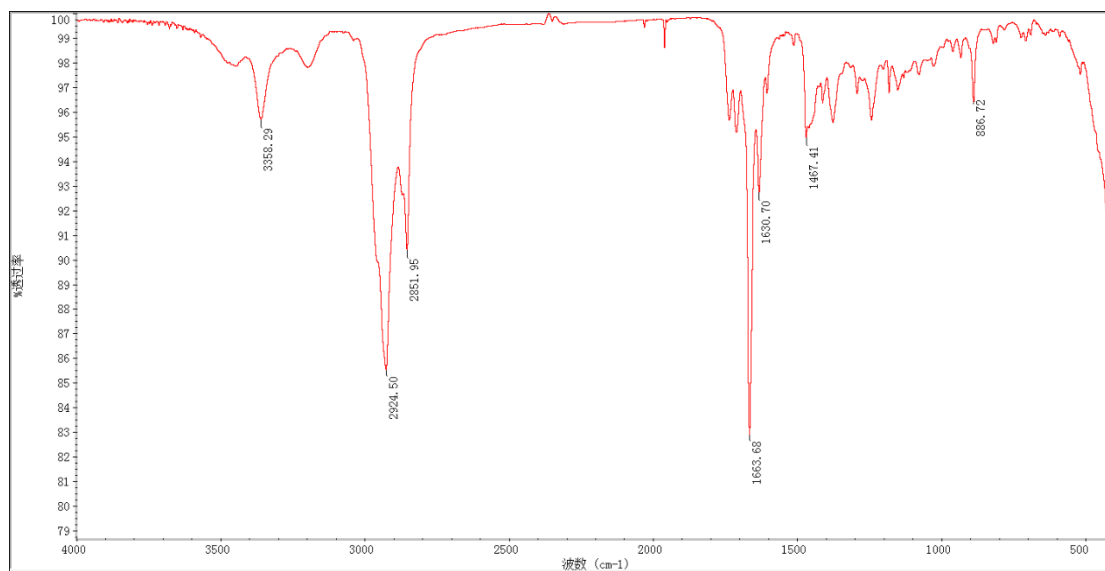

**Figure S16.** IR spectrum of compound **2**.

### 3. Spectra of compound 3

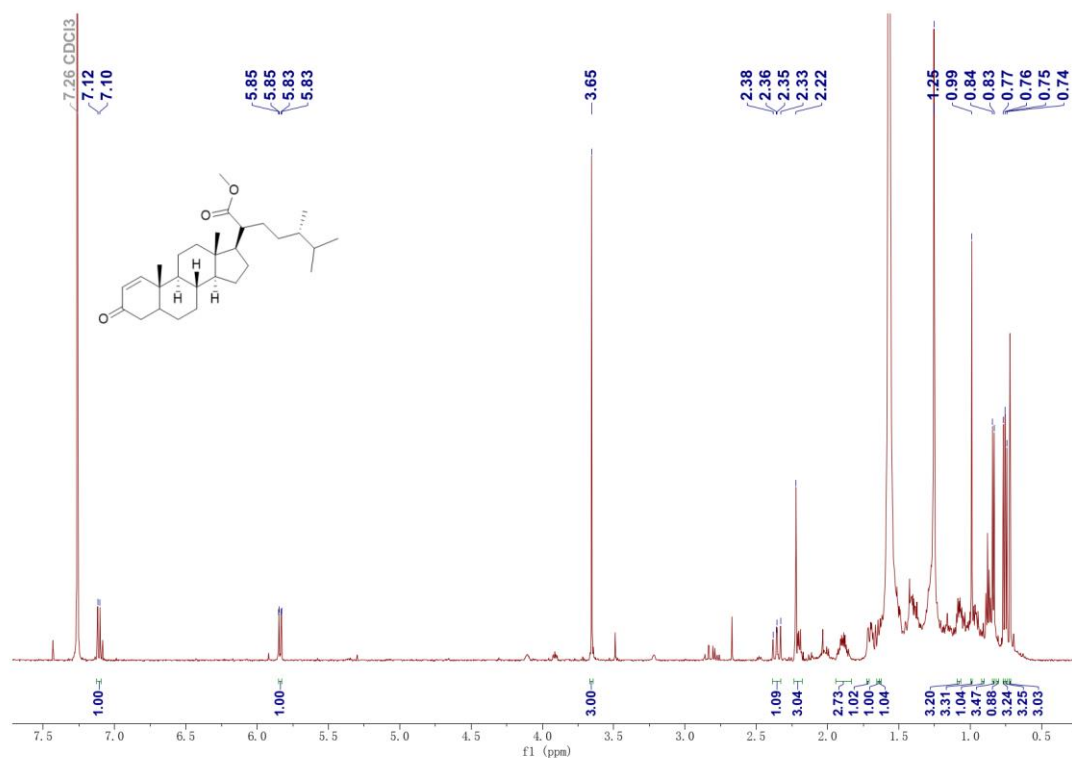

Figure S17. <sup>1</sup>H NMR spectrum (600 MHz) of compound 3 in CDCl<sub>3</sub>.

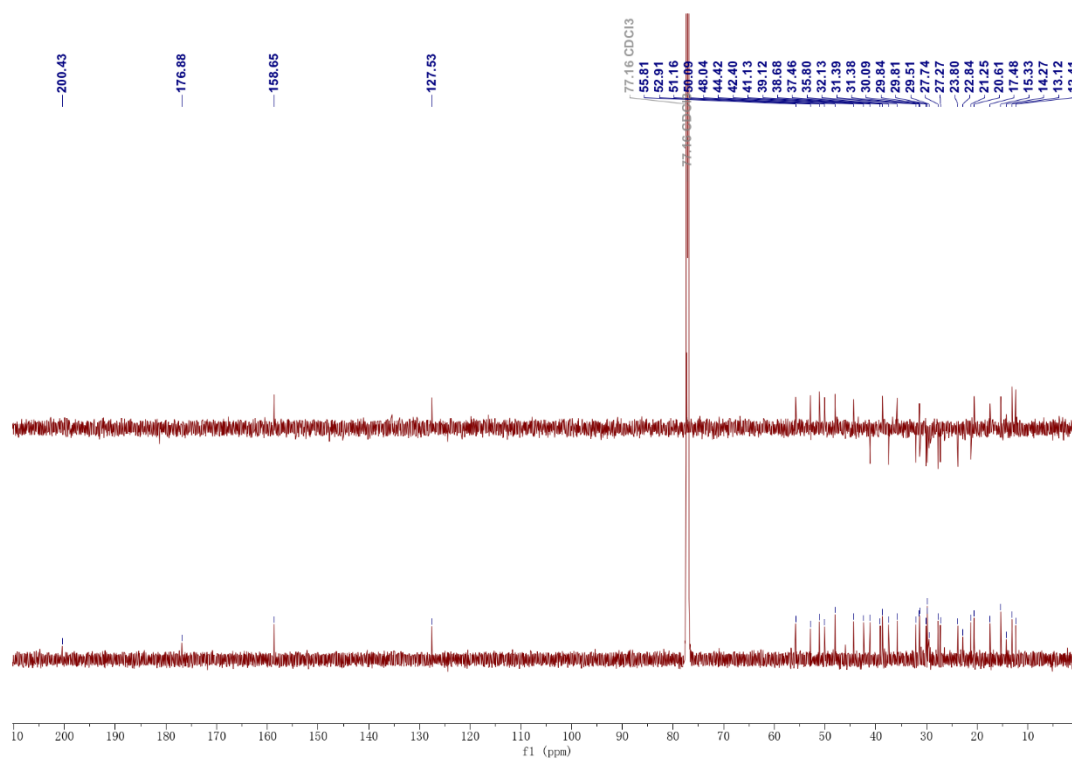

Figure S18. <sup>13</sup>C NMR spectrum (200 MHz) of compound 3 in CDCl<sub>3</sub>.

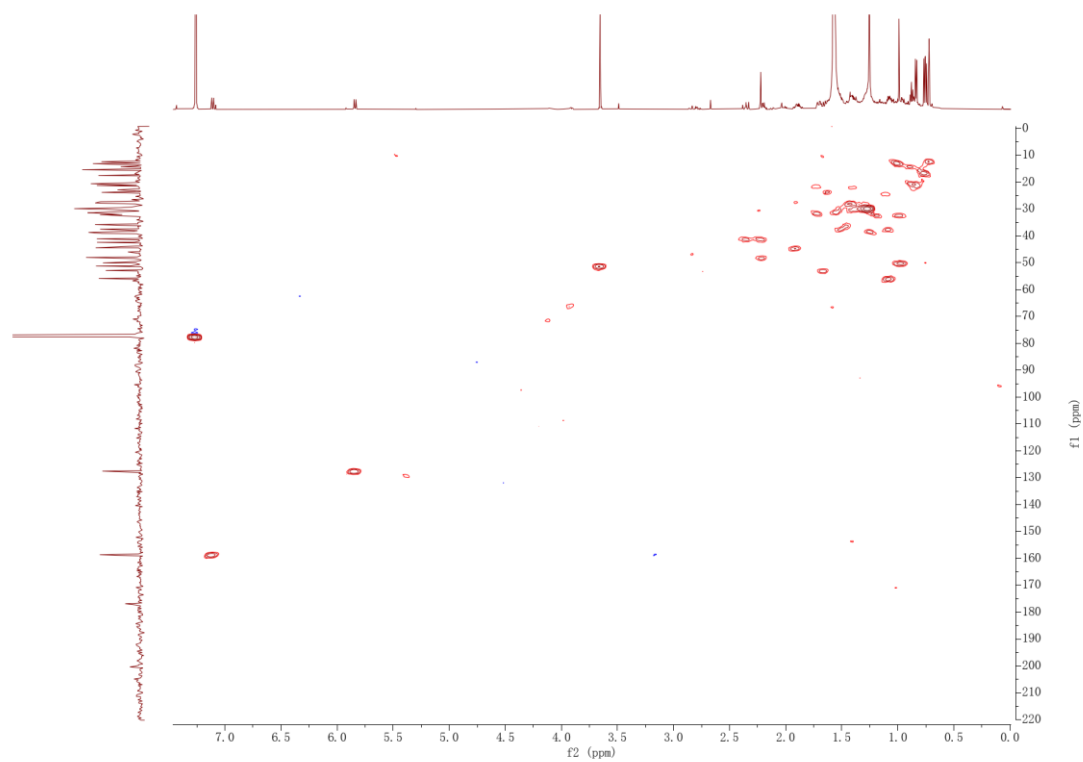

**Figure S19.** HSQC spectrum (600 MHz) of compound **3** in CDCl<sub>3</sub>.

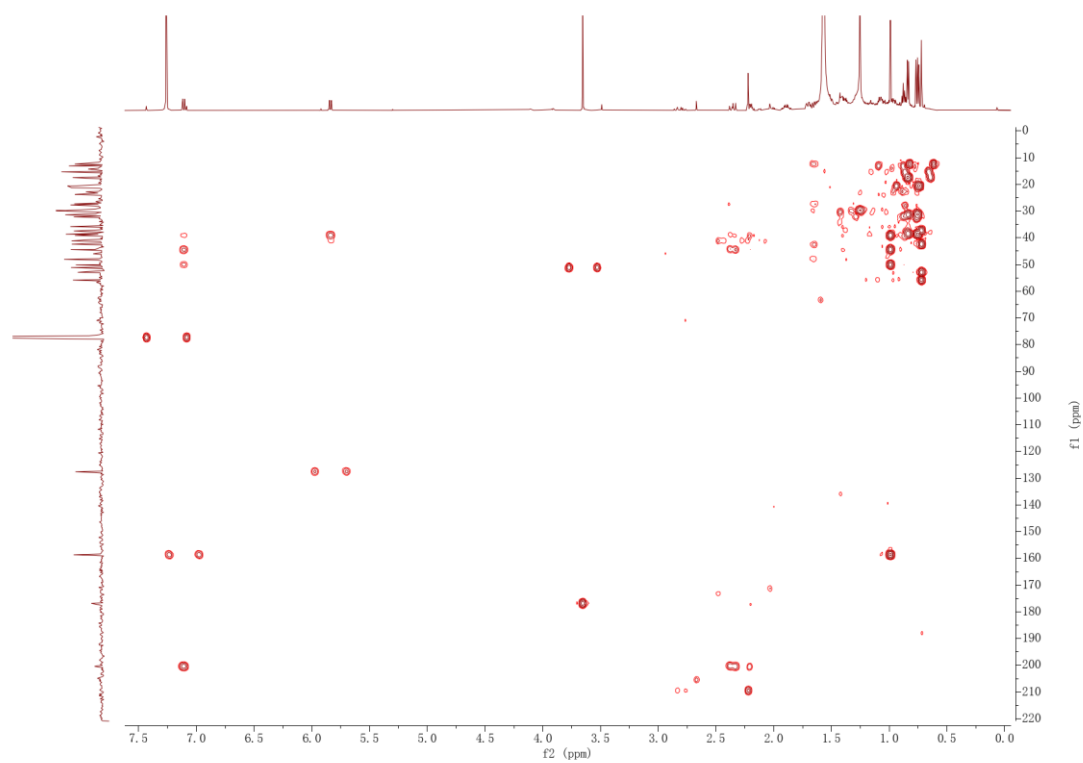

**Figure S20.** HMBC spectrum (600 MHz) of compound **3** in CDCl<sub>3</sub>.

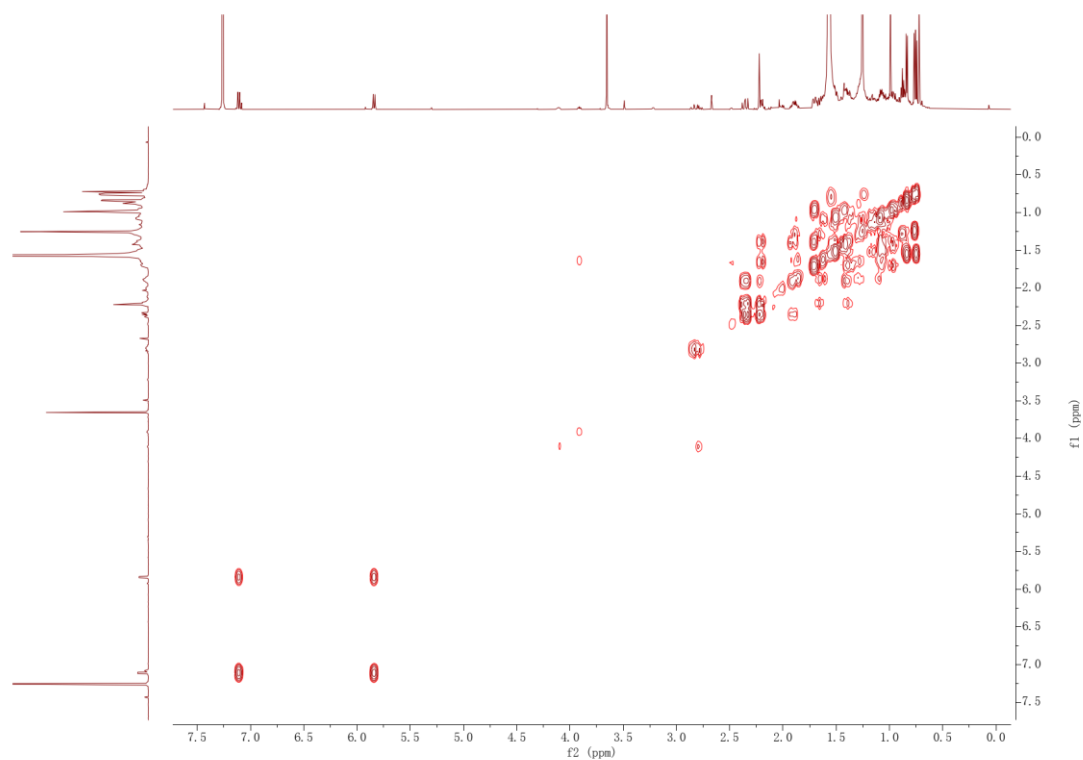

**Figure S21.**  $^1\text{H}$ - $^1\text{H}$  COSY spectrum (600 MHz) of compound **3** in  $\text{CDCl}_3$ .

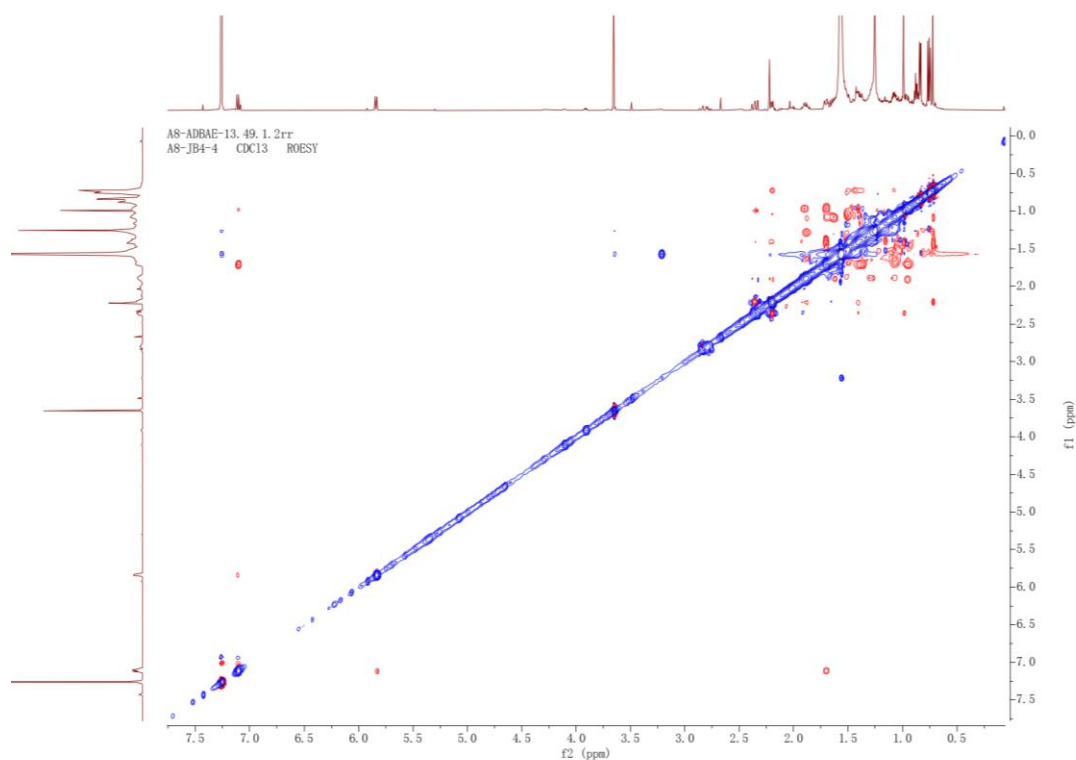

**Figure S22.** ROESY spectrum (600 MHz) of compound **3** in  $\text{CDCl}_3$ .

|                        |                                        |                               |                             |
|------------------------|----------------------------------------|-------------------------------|-----------------------------|
| <b>Data Filename</b>   | ESI202302105.d                         | <b>Sample Name</b>            | A8-A8-ADBAE-13              |
| <b>Sample ID</b>       |                                        | <b>Position</b>               | P1-A1                       |
| <b>Instrument Name</b> | Agilent 6520 Q-TOF                     | <b>Acq Method</b>             | 20160322_MS_ESIH_POS_1min.m |
| <b>Acquired Time</b>   | 3/28/2023 14:46:28                     | <b>IRM Calibration Status</b> | Success                     |
| <b>DA Method</b>       | small molecular data analysis method.m | <b>Comment</b>                | ESIH by fangsu              |

#### User Spectra

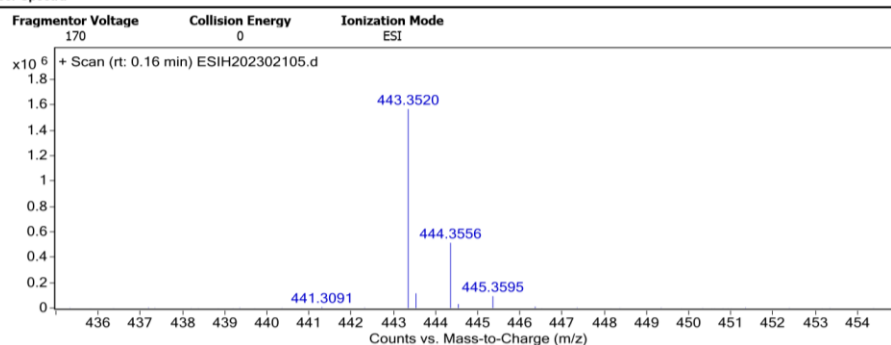

#### Formula Calculator Results

| m/z     | Calc m/z | Diff (mDa) | Diff (ppm) | Ion Formula                                    | Ion                |
|---------|----------|------------|------------|------------------------------------------------|--------------------|
| 443.352 | 443.352  | 0          | -0.01      | C <sub>29</sub> H <sub>47</sub> O <sub>3</sub> | (M+H) <sup>+</sup> |

**Figure S23.** HR-ESIMS spectrum of compound **3**.

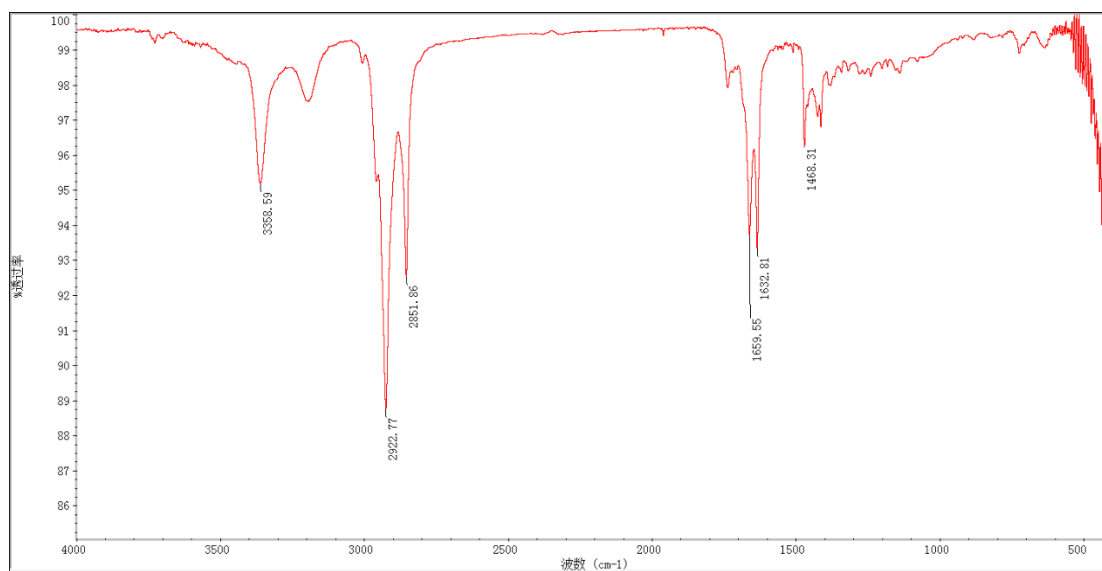

**Figure S24.** IR spectrum of compound **3**.

#### 4. Spectra of compound 4

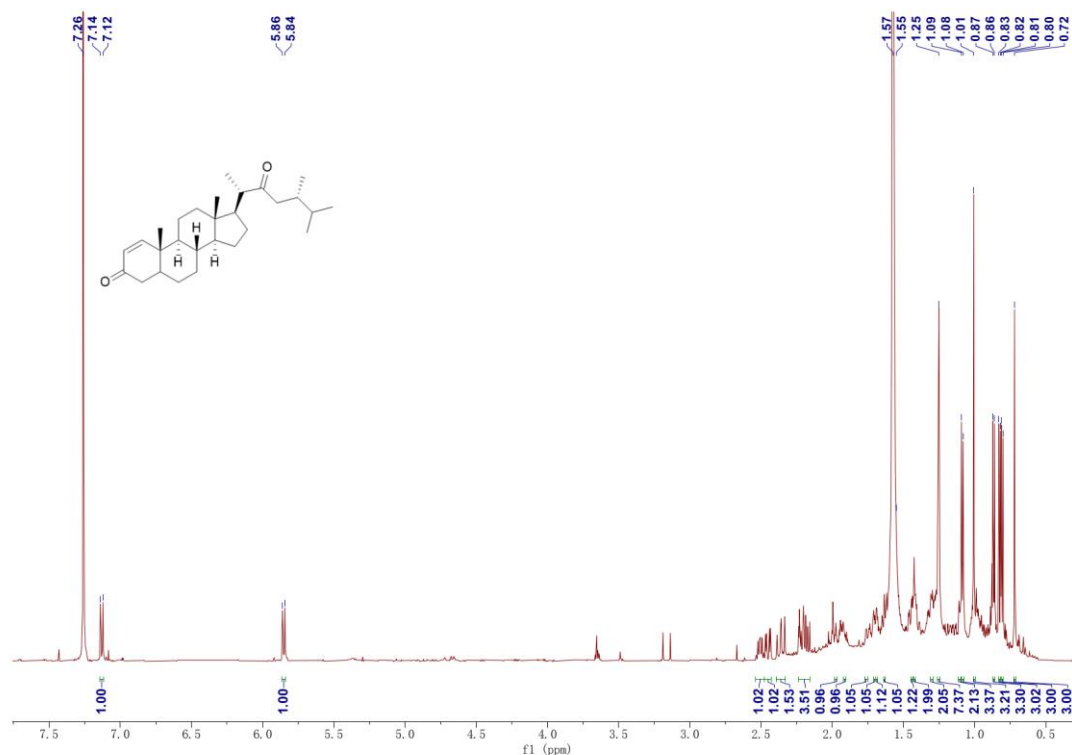

**Figure S25.** <sup>1</sup>H NMR spectrum (600 MHz) of compound 4 in CDCl<sub>3</sub>.

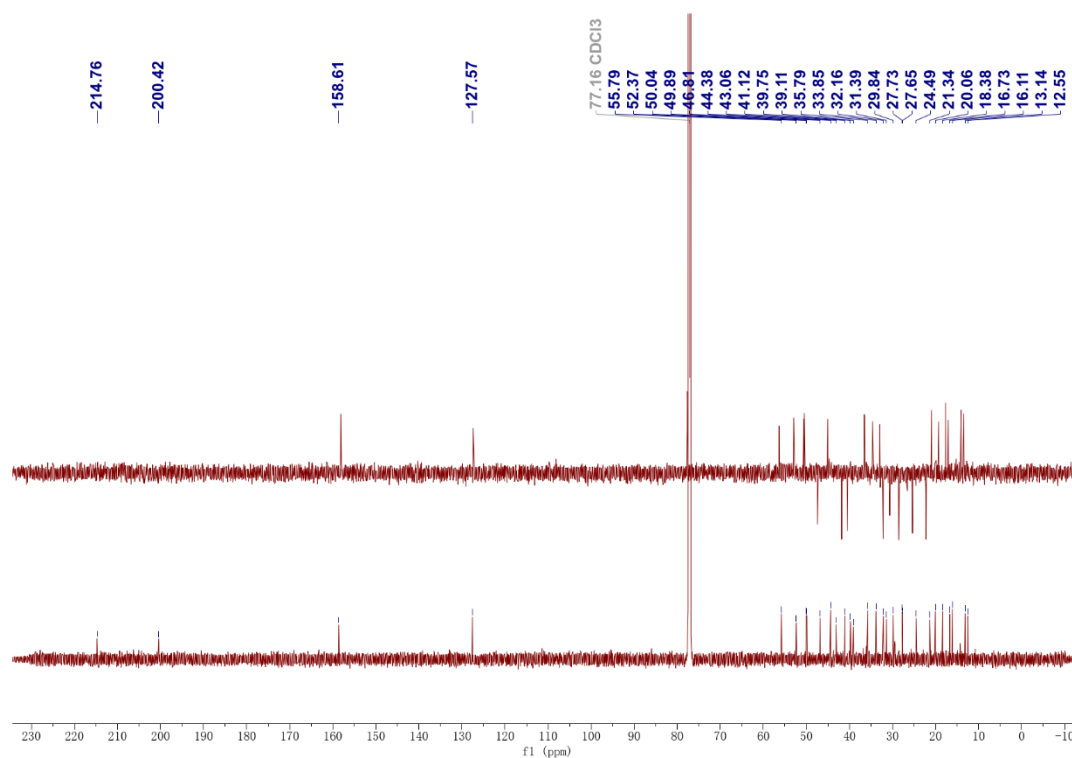

**Figure S26.** <sup>13</sup>C NMR spectrum (200 MHz) of compound 4 in CDCl<sub>3</sub>.

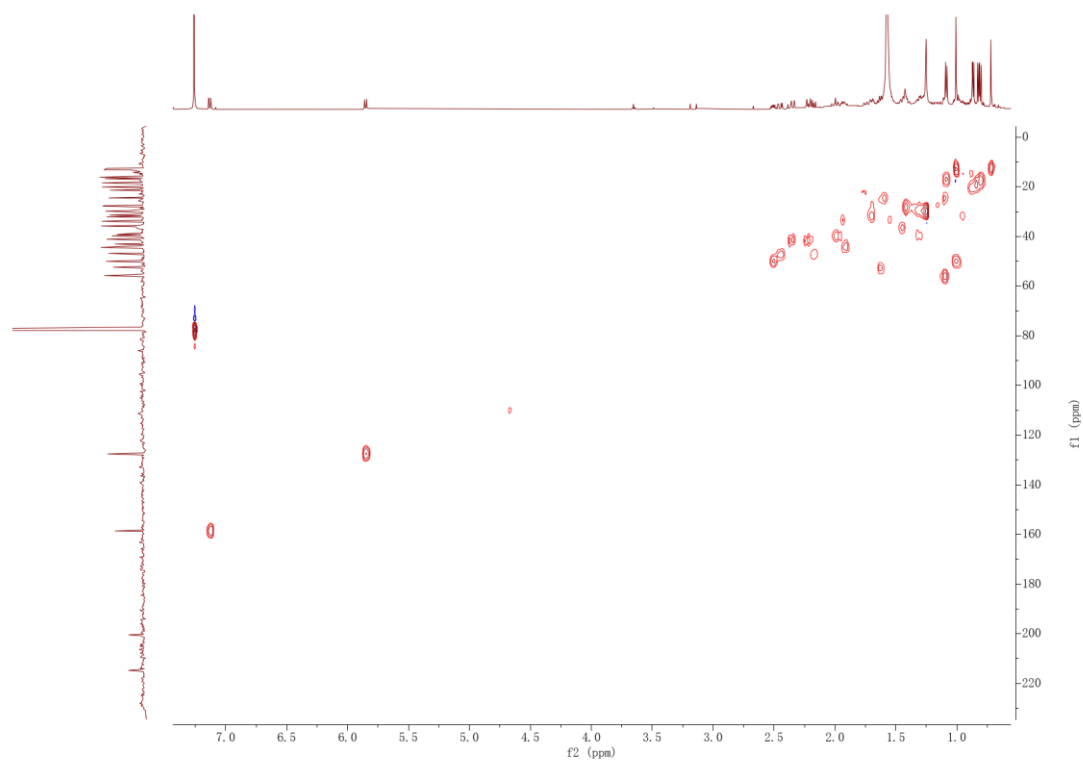

**Figure S27.** HSQC spectrum (600 MHz) of compound **4** in  $\text{CDCl}_3$ .

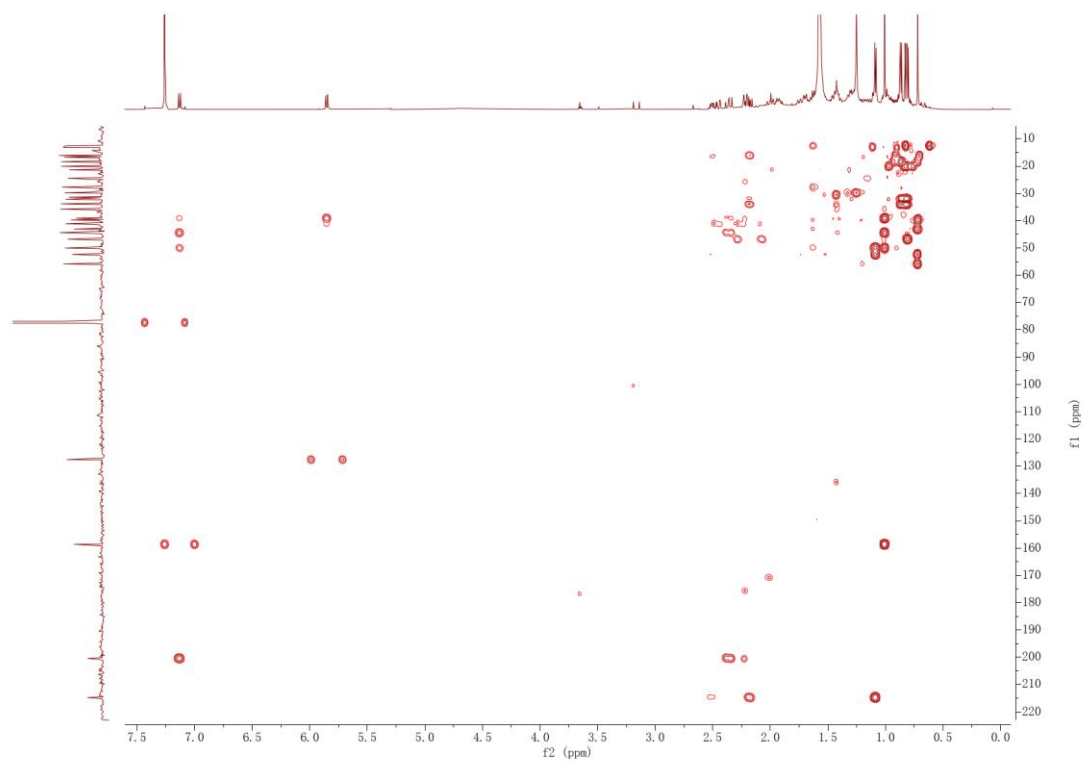

**Figure S28.** HMBC spectrum (600 MHz) of compound **4** in  $\text{CDCl}_3$ .



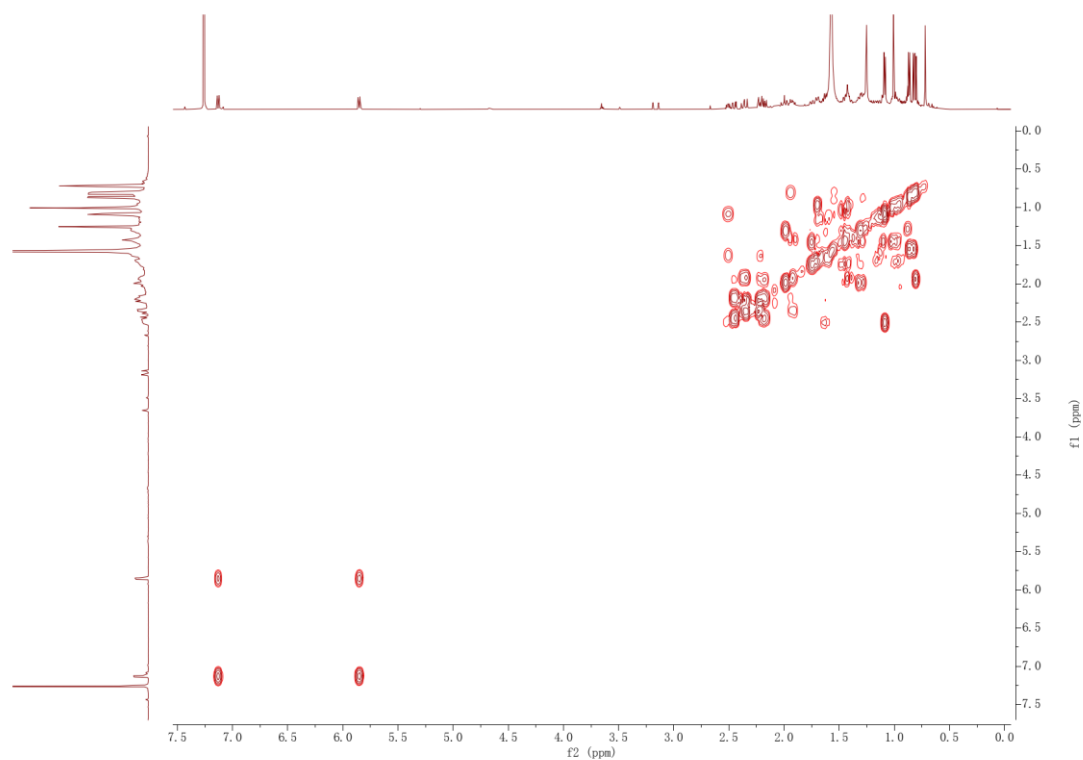

**Figure S29.**  $^1\text{H}$ - $^1\text{H}$  COSY spectrum (600 MHz) of compound **4** in  $\text{CDCl}_3$ .

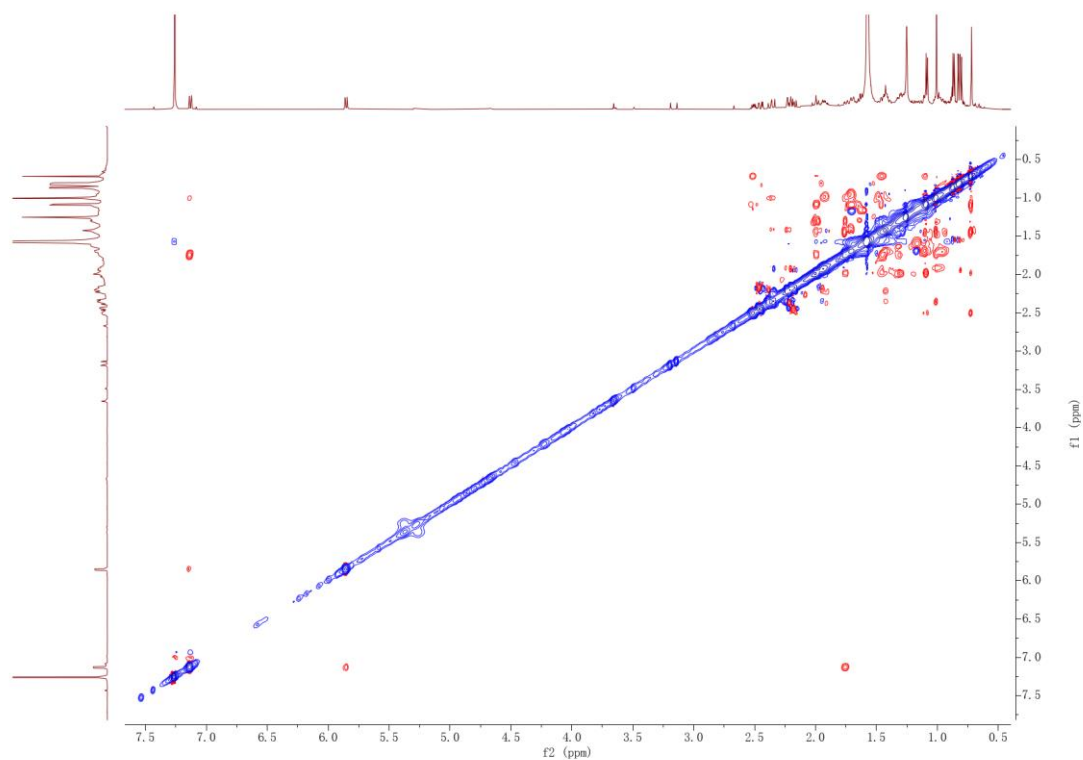

**Figure S30.** ROESY spectrum (600 MHz) of compound **4** in  $\text{CDCl}_3$ .

|                        |                                        |                               |                             |
|------------------------|----------------------------------------|-------------------------------|-----------------------------|
| <b>Data Filename</b>   | ESI202203323.d                         | <b>Sample Name</b>            | A8-A8-ADBAE12               |
| <b>Sample ID</b>       |                                        | <b>Position</b>               | P1-F4                       |
| <b>Instrument Name</b> | Agilent G6520 Q-TOF                    | <b>Acq Method</b>             | 20160322_MS_ESIH_POS_1min.m |
| <b>Acquired Time</b>   | 9/14/2022 15:22:02                     | <b>IRM Calibration Status</b> | Success                     |
| <b>DA Method</b>       | small molecular data analysis method.m | <b>Comment</b>                | ESIH by fangsu              |

#### User Spectra

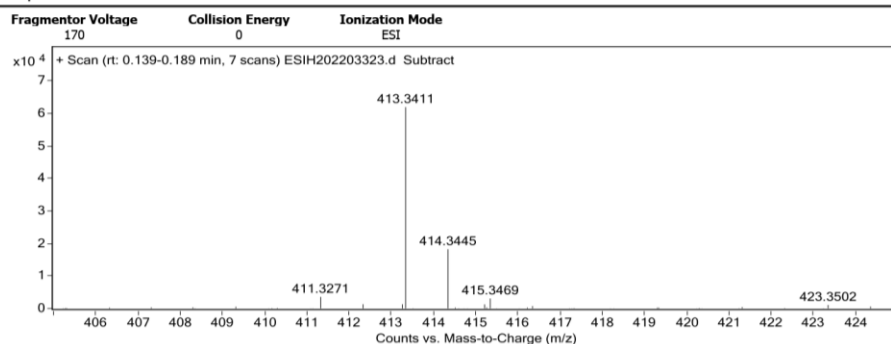

#### Formula Calculator Results

| m/z      | Calc m/z | Diff (mDa) | Diff (ppm) | Ion Formula | Ion    |
|----------|----------|------------|------------|-------------|--------|
| 413.3411 | 413.3414 | 0.27       | 0.65       | C28 H45 O2  | (M+H)+ |

**Figure S31.** HR-ESIMS spectrum of compound **4**.

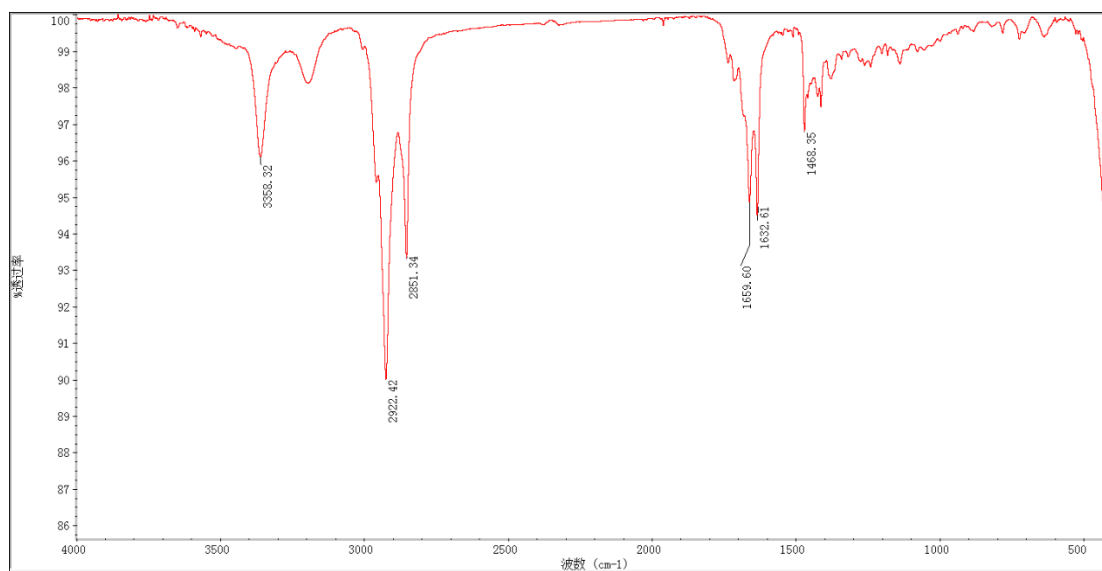

**Figure S32.** IR spectrum of compound **4**.

## 5. Spectra of compound 5

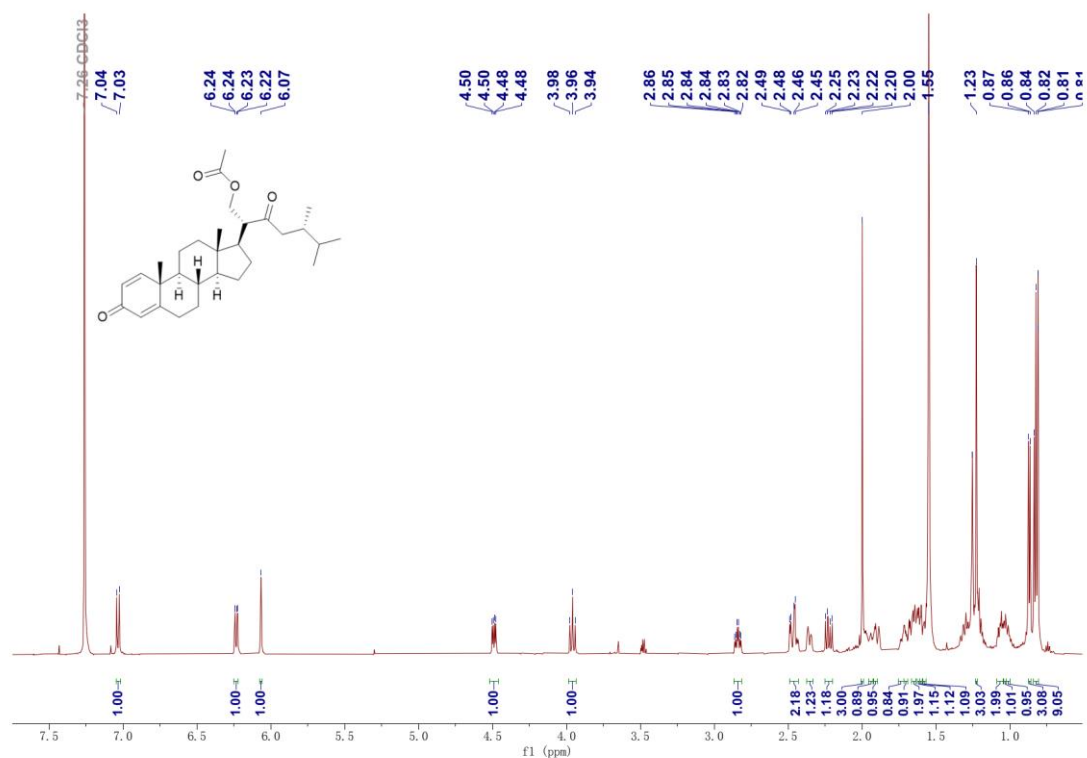

Figure S33. <sup>1</sup>H NMR spectrum (600 MHz) of compound 5 in CDCl<sub>3</sub>.

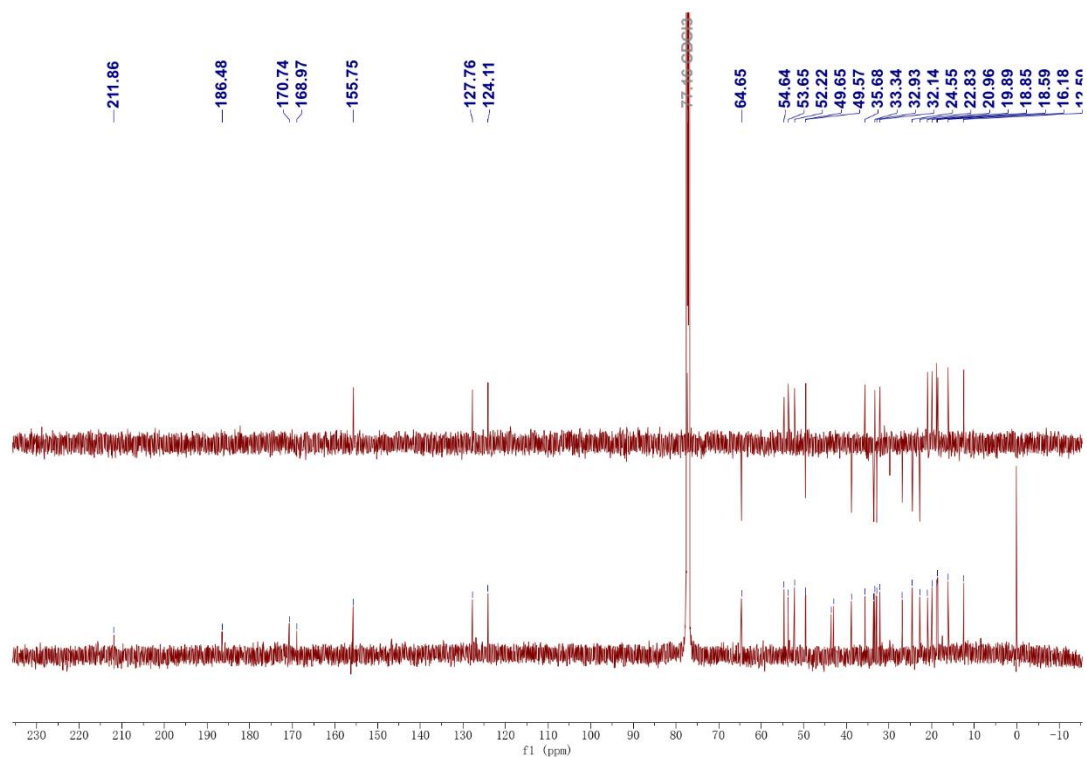

Figure S34. <sup>13</sup>C NMR spectrum (150 MHz) of compound 5 in CDCl<sub>3</sub>.

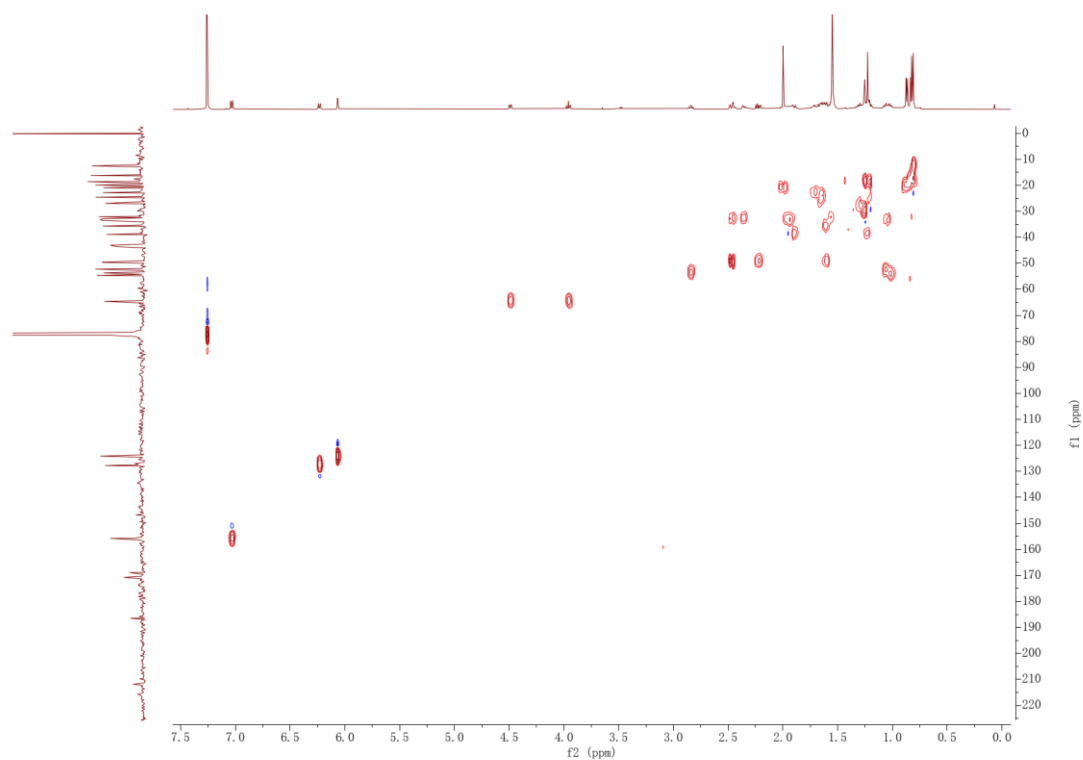

**Figure S35.** HSQC spectrum (600 MHz) of compound **5** in  $\text{CDCl}_3$ .

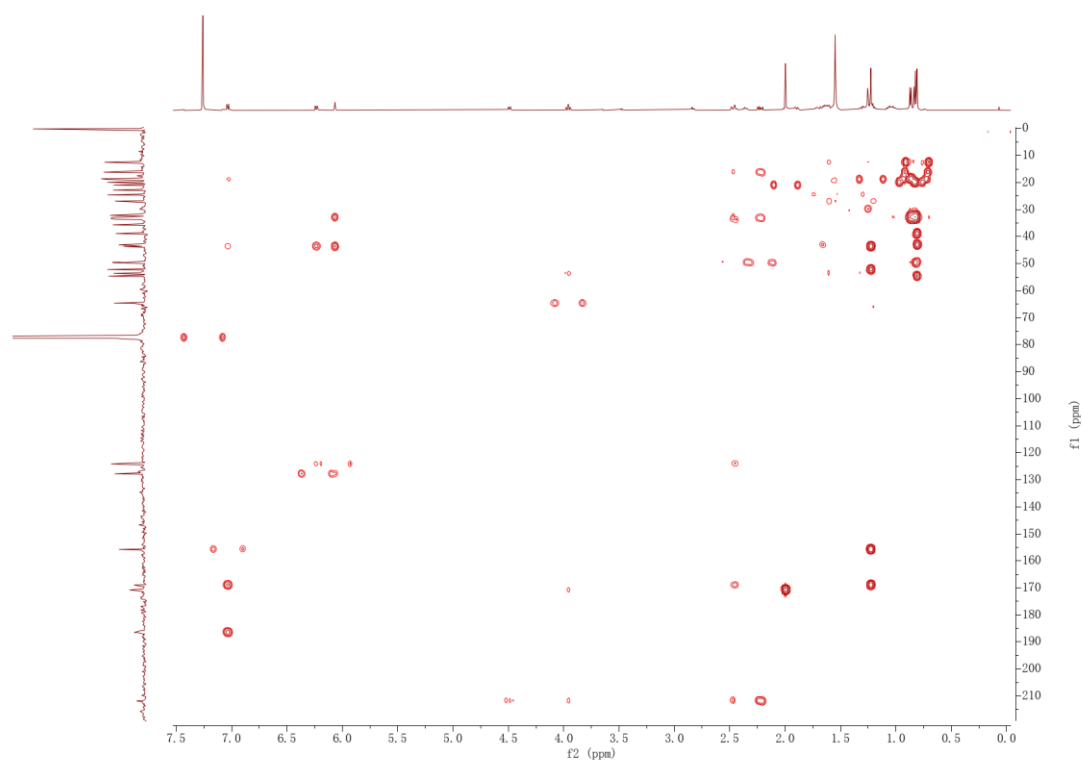

**Figure S36.** HMBC spectrum (600 MHz) of compound **5** in  $\text{CDCl}_3$ .

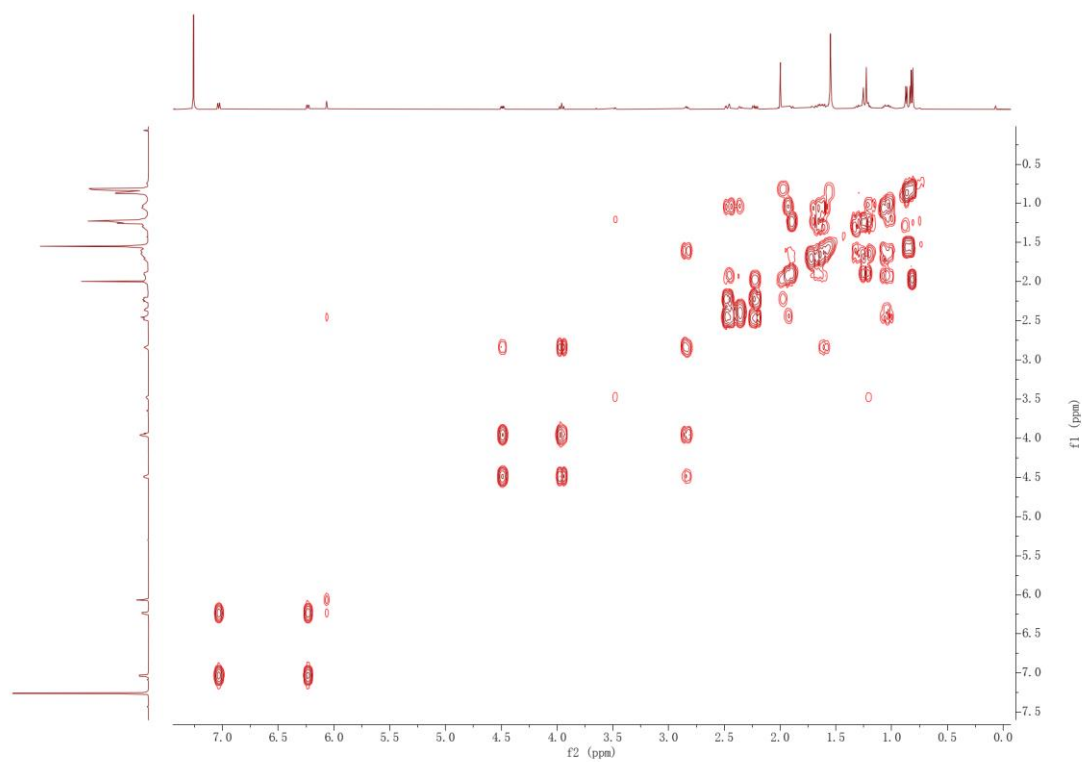

**Figure S37.**  $^1\text{H}$ - $^1\text{H}$  COSY spectrum (600 MHz) of compound **5** in  $\text{CDCl}_3$ .

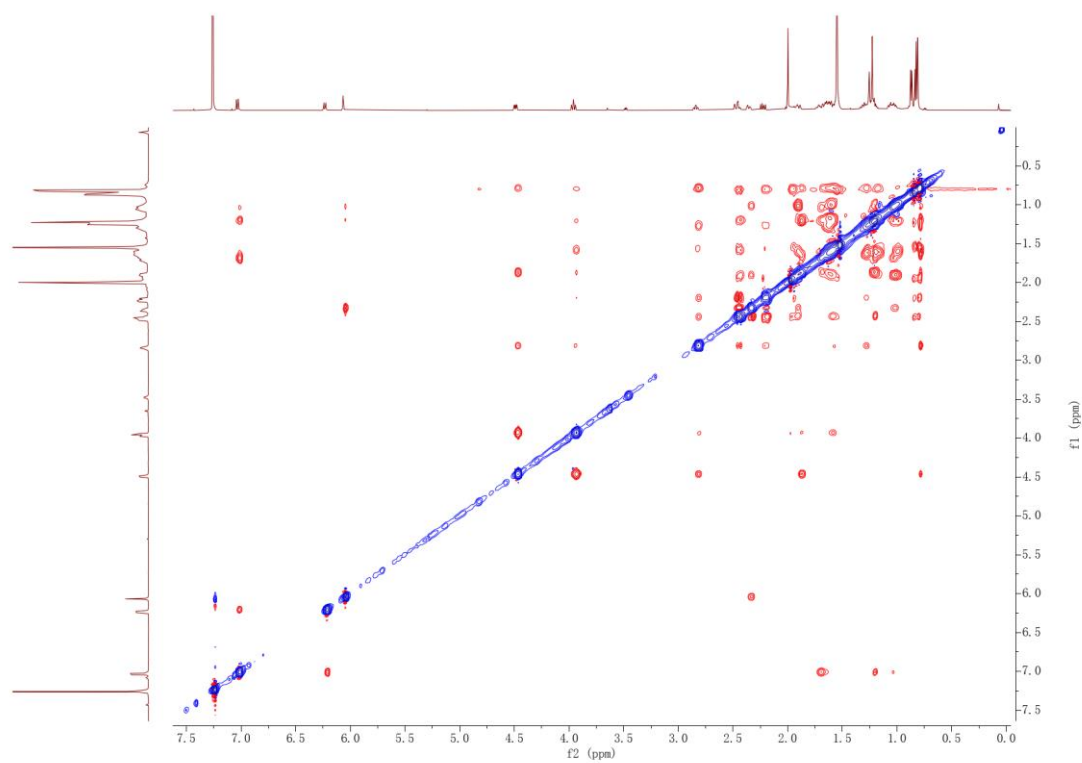

**Figure S38.** NOESY spectrum (600 MHz) of compound **5** in  $\text{CDCl}_3$ .

|                        |                                        |                               |                             |
|------------------------|----------------------------------------|-------------------------------|-----------------------------|
| <b>Data Filename</b>   | ESIH202205796.d                        | <b>Sample Name</b>            | A8-AFB8BE-6                 |
| <b>Sample ID</b>       |                                        | <b>Position</b>               | P1-D2                       |
| <b>Instrument Name</b> | Agilent G6520 Q-TOF                    | <b>Acq Method</b>             | 20160322_MS_ESIH_POS_1min.m |
| <b>Acquired Time</b>   | 12/20/2022 15:04:07                    | <b>IRM Calibration Status</b> | Success                     |
| <b>DA Method</b>       | small molecular data analysis method.m | <b>Comment</b>                | ESIH by zhuzhenyun          |

#### User Spectra

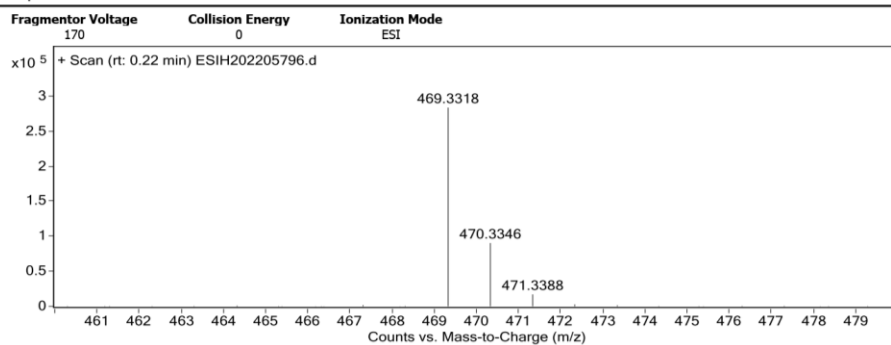

#### Formula Calculator Results

| m/z      | Calc m/z | Diff (mDa) | Diff (ppm) | Ion Formula | Ion    |
|----------|----------|------------|------------|-------------|--------|
| 469.3318 | 469.3312 | -0.56      | -1.19      | C30 H45 O4  | (M+H)+ |

**Figure S39.** HR-ESIMS spectrum of compound **5**.

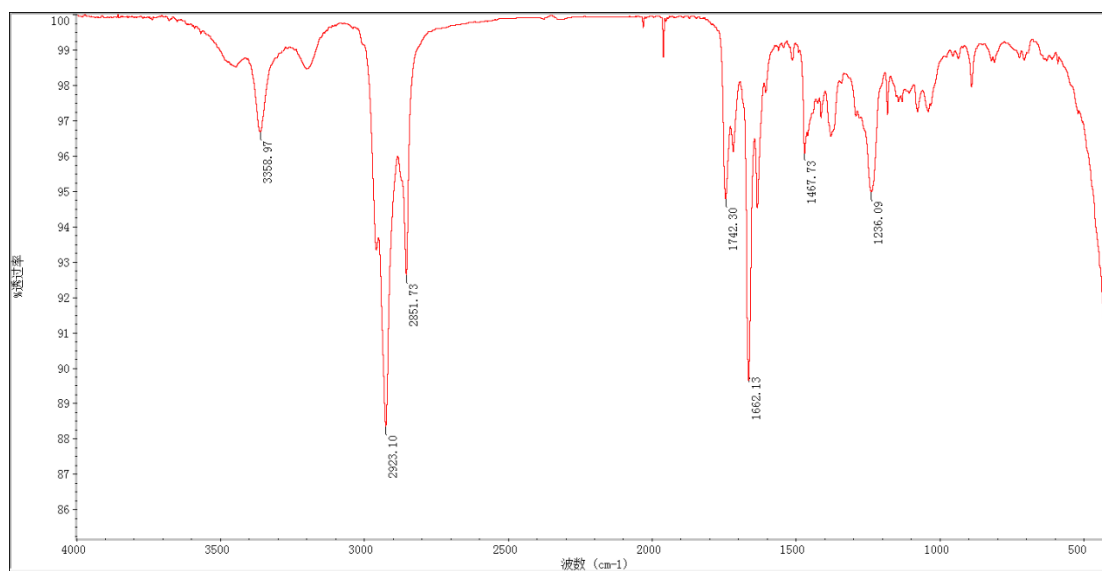

**Figure S40.** IR spectrum of compound **5**.

## 6. Spectra of compound 6

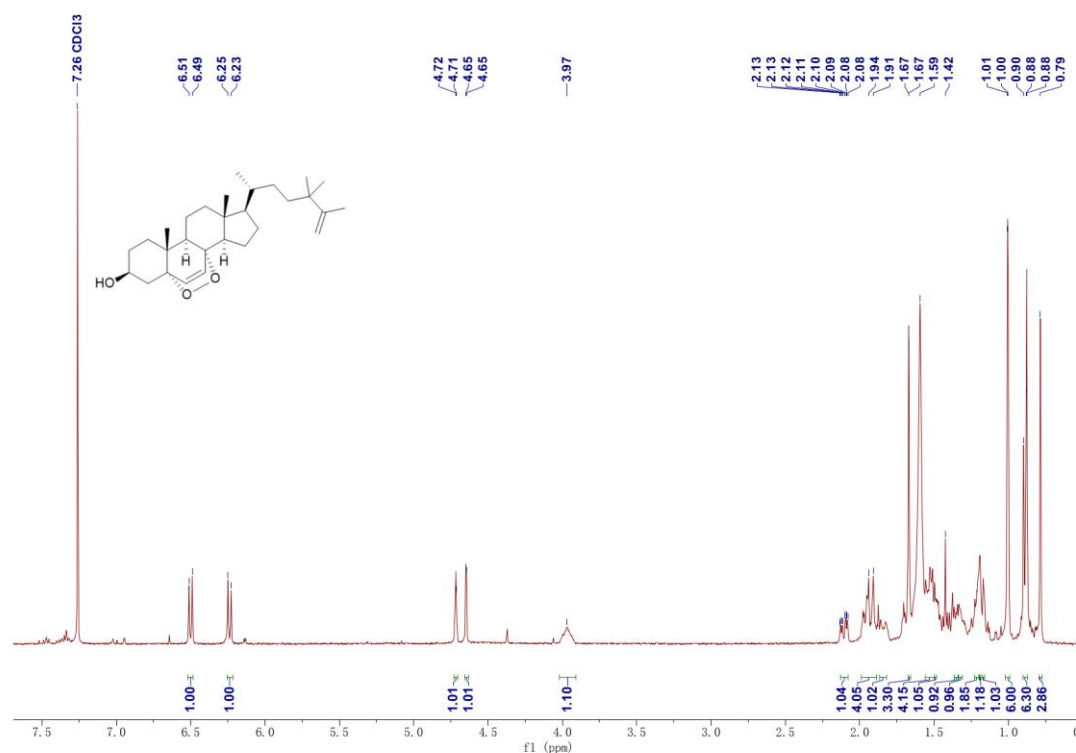

**Figure S41.** <sup>1</sup>H NMR spectrum (400 MHz) of compound **6** in CDCl<sub>3</sub>.

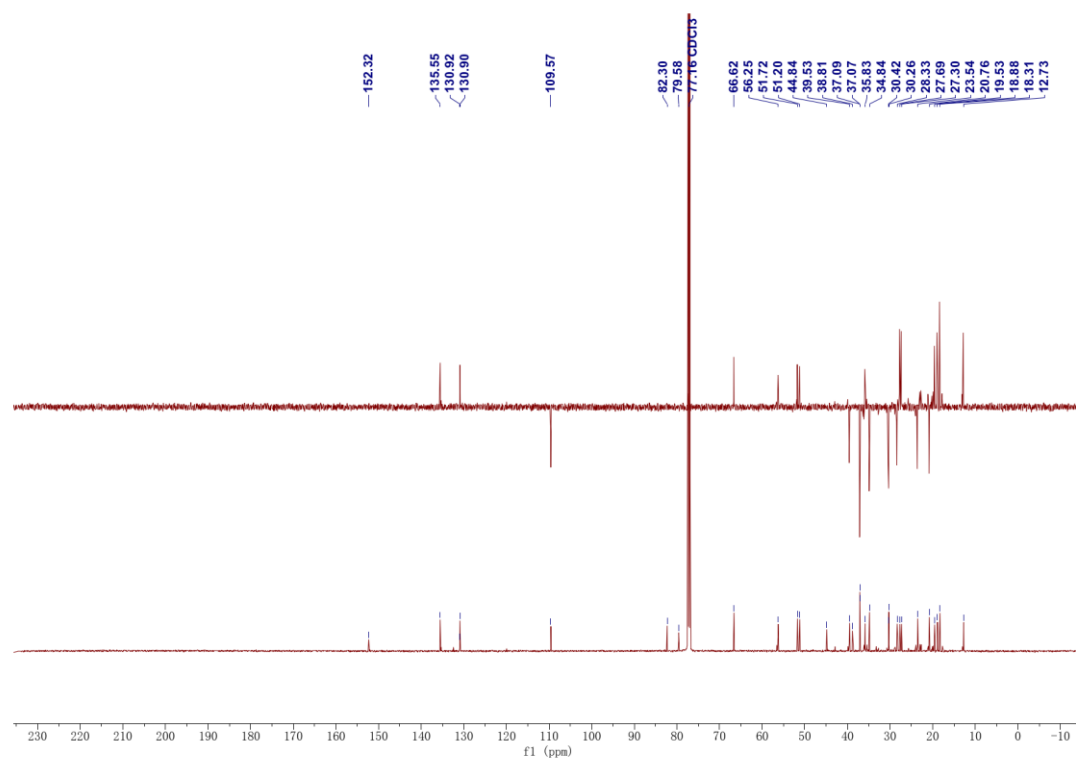

**Figure S42.** <sup>13</sup>C NMR spectrum (150 MHz) of compound **6** in CDCl<sub>3</sub>.

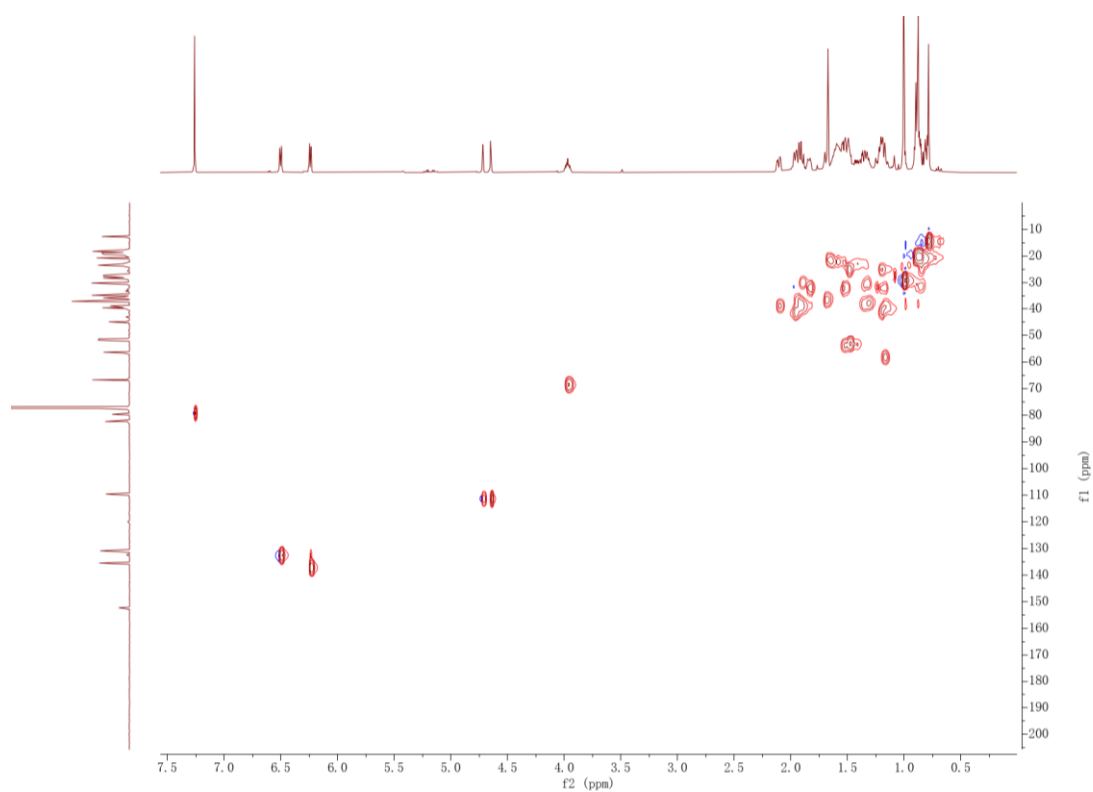

**Figure S43.** HSQC spectrum (600 MHz) of compound **6** in CDCl<sub>3</sub>.

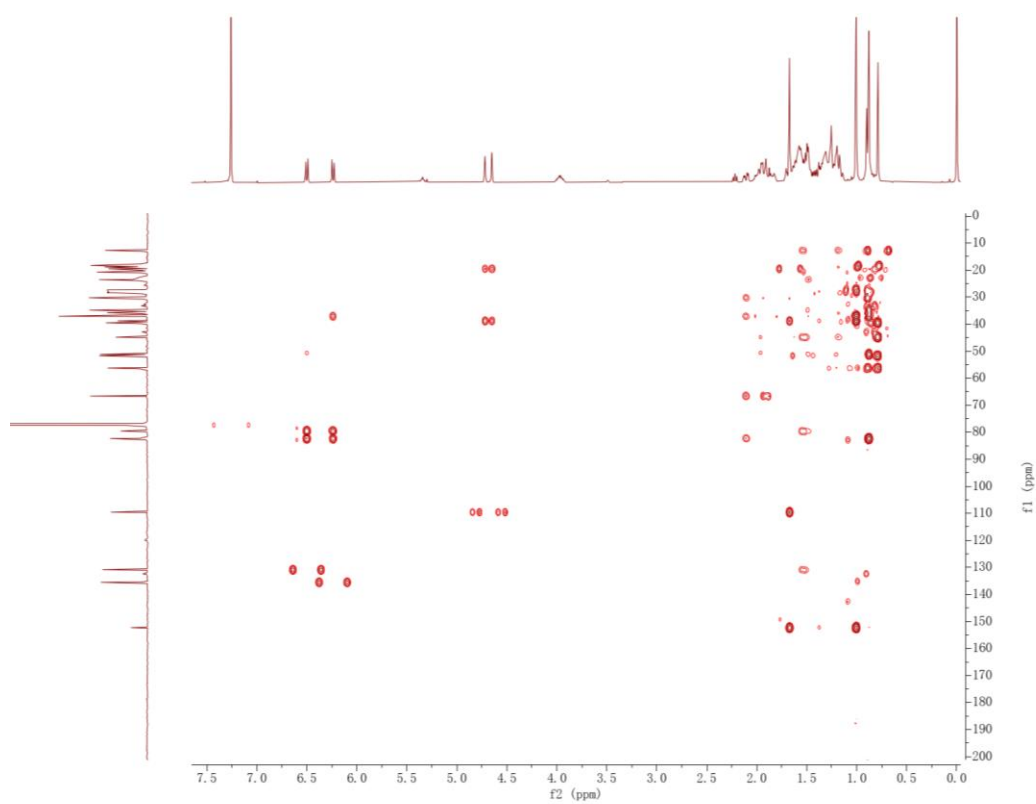

**Figure S44.** HMBC spectrum (600 MHz) of compound **6** in CDCl<sub>3</sub>.





EI202300247\_A8-2CBgCD-7 -c1#17 RT: 3.30

T: + c EI Full ms [ 49.50-800.50]

m/z= 48-803

| m/z      | Intensity  | Relative | Theo.<br>Mass | Delta<br>(mmu) | RDB<br>equiv. | Composition                                    |
|----------|------------|----------|---------------|----------------|---------------|------------------------------------------------|
| 69.0692  | 2526253.0  | 14.16    | 69.0699       | -0.67          | 1.5           | C <sub>5</sub> H <sub>9</sub>                  |
| 79.0176  | 1227372.0  | 6.88     | 79.0178       | -0.23          | 4.5           | C <sub>5</sub> H <sub>3</sub> O <sub>1</sub>   |
| 93.0697  | 1596930.0  | 8.95     | 93.0699       | -0.15          | 3.5           | C <sub>7</sub> H <sub>9</sub>                  |
| 95.0865  | 1721079.0  | 9.65     | 95.0855       | 0.97           | 2.5           | C <sub>7</sub> H <sub>11</sub>                 |
| 119.0858 | 1105517.0  | 6.20     | 119.0855      | 0.27           | 4.5           | C <sub>9</sub> H <sub>11</sub>                 |
| 121.1009 | 849310.0   | 4.76     | 121.1012      | -0.23          | 3.5           | C <sub>9</sub> H <sub>13</sub>                 |
| 123.1161 | 662506.0   | 3.71     | 123.1168      | -0.69          | 2.5           | C <sub>9</sub> H <sub>15</sub>                 |
| 131.0844 | 863563.0   | 4.84     | 131.0855      | -1.09          | 5.5           | C <sub>10</sub> H <sub>11</sub>                |
| 133.1005 | 884241.0   | 4.96     | 133.1012      | -0.70          | 4.5           | C <sub>10</sub> H <sub>13</sub>                |
| 137.1317 | 646525.0   | 3.62     | 137.1325      | -0.77          | 2.5           | C <sub>10</sub> H <sub>17</sub>                |
| 143.0848 | 1464170.0  | 8.21     | 143.0855      | -0.71          | 6.5           | C <sub>11</sub> H <sub>11</sub>                |
| 145.1009 | 1483471.0  | 8.32     | 145.1012      | -0.29          | 5.5           | C <sub>11</sub> H <sub>13</sub>                |
| 152.0828 | 1155889.0  | 6.48     | 152.0832      | -0.35          | 4.0           | C <sub>9</sub> H <sub>12</sub> O <sub>2</sub>  |
| 157.1010 | 1241274.0  | 6.96     | 157.1012      | -0.20          | 6.5           | C <sub>12</sub> H <sub>13</sub>                |
| 158.1074 | 1285518.0  | 7.21     | 158.1090      | -1.55          | 6.0           | C <sub>12</sub> H <sub>14</sub>                |
| 159.1150 | 1343098.0  | 7.53     | 159.1168      | -1.79          | 5.5           | C <sub>12</sub> H <sub>15</sub>                |
| 161.0947 | 745542.0   | 4.18     | 161.0961      | -1.39          | 5.5           | C <sub>11</sub> H <sub>13</sub> O <sub>1</sub> |
| 171.1161 | 1103951.0  | 6.19     | 171.1168      | -0.71          | 6.5           | C <sub>13</sub> H <sub>15</sub>                |
| 183.1162 | 778880.0   | 4.37     | 183.1168      | -0.63          | 7.5           | C <sub>14</sub> H <sub>15</sub>                |
| 185.1315 | 889154.0   | 4.99     | 185.1325      | -1.01          | 6.5           | C <sub>14</sub> H <sub>17</sub>                |
| 197.1324 | 1271589.0  | 7.13     | 197.1325      | -0.06          | 7.5           | C <sub>15</sub> H <sub>17</sub>                |
| 199.1478 | 937934.0   | 5.26     | 199.1481      | -0.32          | 6.5           | C <sub>15</sub> H <sub>19</sub>                |
| 209.1330 | 627898.0   | 3.52     | 209.1325      | 0.51           | 8.5           | C <sub>16</sub> H <sub>17</sub>                |
| 211.1466 | 1328899.0  | 7.45     | 211.1481      | -1.50          | 7.5           | C <sub>16</sub> H <sub>19</sub>                |
| 249.1640 | 669200.0   | 3.75     | 249.1638      | 0.25           | 9.5           | C <sub>19</sub> H <sub>21</sub>                |
| 251.1779 | 1080331.0  | 6.06     | 251.1794      | -1.50          | 8.5           | C <sub>19</sub> H <sub>23</sub>                |
| 253.1954 | 798748.0   | 4.48     | 253.1951      | 0.36           | 7.5           | C <sub>19</sub> H <sub>25</sub>                |
| 267.1750 | 725700.0   | 4.07     | 267.1743      | 0.68           | 8.5           | C <sub>19</sub> H <sub>23</sub> O <sub>1</sub> |
| 271.2060 | 683373.0   | 3.83     | 271.2056      | 0.40           | 6.5           | C <sub>19</sub> H <sub>27</sub> O <sub>1</sub> |
| 293.1911 | 626252.0   | 3.51     | 293.1900      | 1.13           | 9.5           | C <sub>21</sub> H <sub>25</sub> O <sub>1</sub> |
| 341.2836 | 751534.0   | 4.21     | 341.2839      | -0.32          | 6.5           | C <sub>24</sub> H <sub>37</sub> O <sub>1</sub> |
| 351.3039 | 3330212.0  | 18.67    | 351.3046      | -0.69          | 7.5           | C <sub>26</sub> H <sub>39</sub>                |
| 377.3198 | 7690815.0  | 43.12    | 377.3203      | -0.48          | 8.5           | C <sub>28</sub> H <sub>41</sub>                |
| 390.3278 | 639938.0   | 3.59     | 390.3281      | -0.29          | 9.0           | C <sub>29</sub> H <sub>42</sub>                |
| 391.3008 | 912396.0   | 5.12     | 391.2995      | 1.21           | 9.5           | C <sub>28</sub> H <sub>39</sub> O <sub>1</sub> |
| 392.3418 | 643150.0   | 3.61     | 392.3438      | -1.96          | 8.0           | C <sub>29</sub> H <sub>44</sub>                |
| 395.3318 | 706885.0   | 3.96     | 395.3308      | 0.99           | 7.5           | C <sub>28</sub> H <sub>43</sub> O <sub>1</sub> |
| 406.3231 | 953240.0   | 5.34     | 406.3230      | 0.06           | 9.0           | C <sub>29</sub> H <sub>42</sub> O <sub>1</sub> |
| 410.3547 | 17835264.0 | 100.00   | 410.3543      | 0.36           | 7.0           | C <sub>29</sub> H <sub>46</sub> O <sub>1</sub> |
| 424.3325 | 1101792.0  | 6.18     | 424.3336      | -1.11          | 8.0           | C <sub>29</sub> H <sub>44</sub> O <sub>2</sub> |

Figure S47. HR-EIMS spectrum of compound 6.

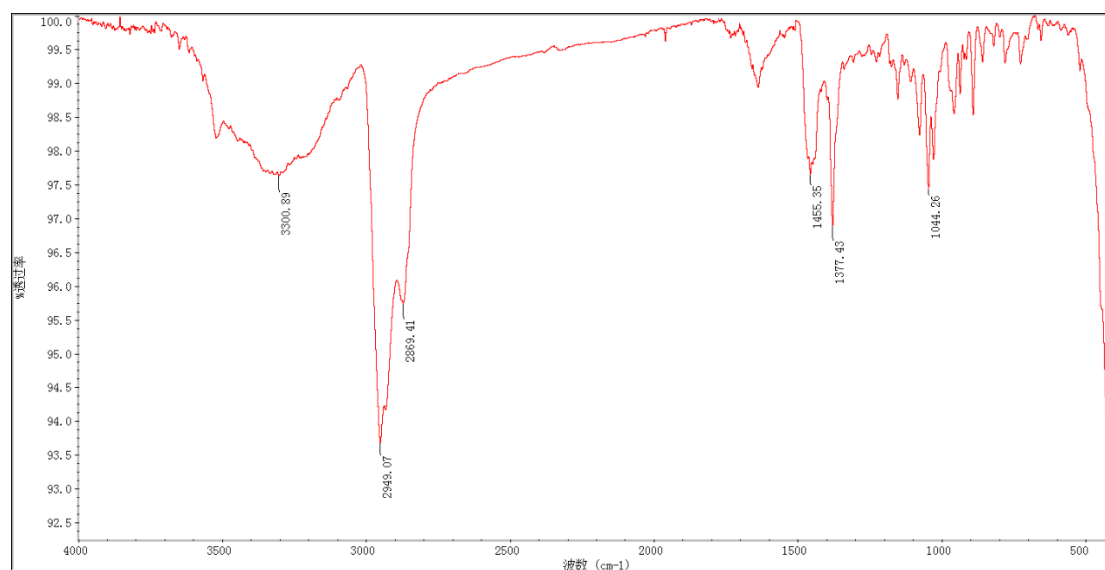

**Figure S48.** IR spectrum of compound **6**.
